# Supplementary material for: LiEC(SiMe3)3(E = Se, Te) as a new donor of chalcogen atoms for the generation of binary [(RxGey)Ez] cage compounds with unique structural features
Source: Royal Society of Chemistry journal article supplement (doi:10.1039/d0dt04280c), 2021-01-01
Supplement: d0dt04280c1.pdf [file d0dt04280c1.pdf]

### Supporting information

1. EDX measurement of crystals of  $[\{(TsiGe)_2GeSe_4\}_2(\mu^2-Se)_2]$  **1**
2. EDX measurement of crystals of  $Ge_2(\mu^2-Te)_2(Tsi)_2(TeH)_2$  **2**
3. EDX measurement of crystals of  $[Li(Et_2O)(OC_4H_7)Ge_3Te_4(Tsi)_2]_2$  **3**
  4. NMR measurements of compounds **1 – 3**
  5. NMR measurement reaction mixture  $GeCl_2$ -dioxane/LiSeTsi
    6. Characterization of Tsi-Te-Te-Tsi
    7. Crystallographic data of Tsi-Te-Te-Tsi
    8. Quantum chemical calculations

1. EDX measurement of crystals of  $[\{(TsiGe)_2GeSe_4\}_2(\mu^2-Se)_2]$  **1**

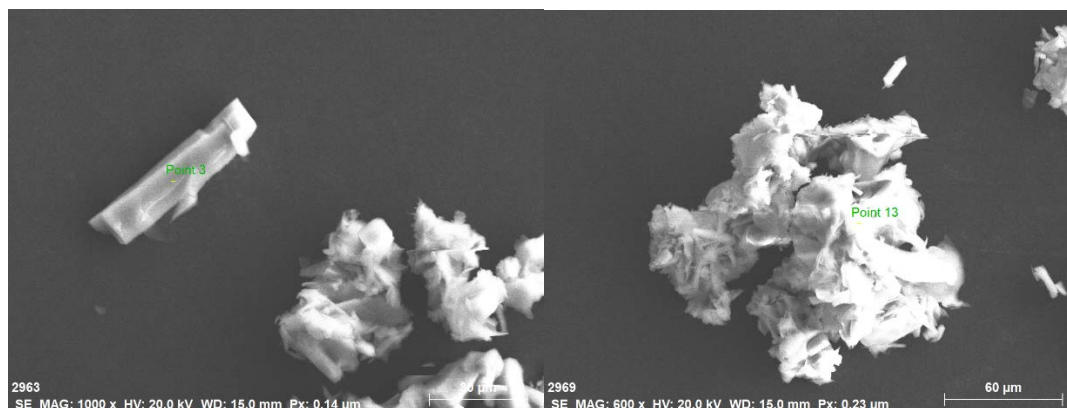

**Fig. S1:** SEM images of a **1** crystallite with the positions 7, 10 where the EDX measurements were performed. **Device:** HITACHI SU8030 scanning electron microscope with Bruker-EDX.

Table S1: Results of the EDX measurement of the crystals at point 3 (fig. S1)

| <i>ELEMENT</i> | <i>NORM. WT. %</i> | <i>NORM. WT. %<br/>CALCULATED</i> | <i>NORM. AT. %</i> | <i>NORM. AT. %<br/>CALCULATED</i> |
|----------------|--------------------|-----------------------------------|--------------------|-----------------------------------|
| <i>GE</i>      | 26.3               | 27.9                              | 20.2               | 21.4                              |
| <i>SE</i>      | 51.9               | 50.5                              | 36.6               | 35.7                              |
| <i>SI</i>      | 21.8               | 21.6                              | 43.2               | 42.9                              |

Table S2: Results of the EDX measurement of the crystals at point 13 (fig. S1)

| <i>ELEMENT</i> | <i>NORM. WT. %</i> | <i>NORM. WT. %<br/>CALCULATED</i> | <i>NORM. AT. %</i> | <i>NORM. AT. %<br/>CALCULATED</i> |
|----------------|--------------------|-----------------------------------|--------------------|-----------------------------------|
| <i>GE</i>      | 28.4               | 27.9                              | 21.5               | 21.4                              |
| <i>SE</i>      | 48.8               | 50.5                              | 34.0               | 35.7                              |
| <i>SI</i>      | 22.8               | 21.6                              | 44.6               | 42.9                              |

Table S3: Average results of the EDX measurement of the crystals

| <i>ELEMENT</i> | <i>Ø NORM. WT.<br/>%</i> | <i>NORM. WT. %<br/>CALCULATED</i> | <i>Ø NORM. AT.<br/>%</i> | <i>NORM. AT. %<br/>CALCULATED</i> |
|----------------|--------------------------|-----------------------------------|--------------------------|-----------------------------------|
| <i>GE</i>      | 26.8                     | 27.9                              | 20.4                     | 21.4                              |
| <i>SE</i>      | 51.0                     | 50.5                              | 35.8                     | 35.7                              |
| <i>SI</i>      | 22.2                     | 21.6                              | 43.8                     | 42.9                              |

## 2. EDX measurement of crystals of $\text{Ge}_2(\mu^2\text{-Te})_2(\text{Tsi})_2(\text{TeH})_2$ **2**

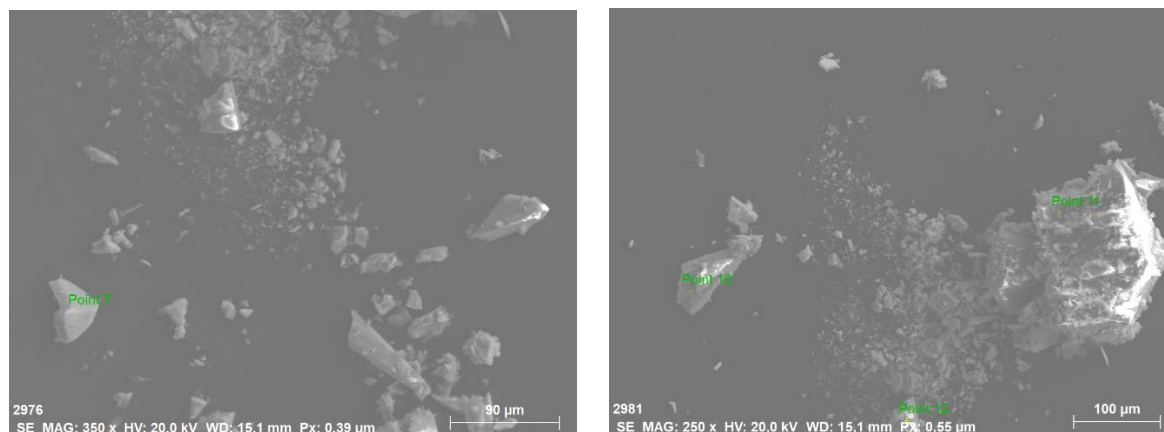

**Fig. S2:** SEM images of a **2** crystallite with the positions 7, 10 where the EDX measurements were performed. **Device:** HITACHI SU8030 scanning electron microscope with Bruker-EDX.

Table S4: Results of the EDX measurement of the crystals at point 7 (Fig. S2)

| <i>ELEMENT</i> | <i>NORM. WT. %</i> | <i>NORM. WT. %<br/>CALCULATED</i> | <i>NORM. AT. %</i> | <i>NORM. AT. %<br/>CALCULATED</i> |
|----------------|--------------------|-----------------------------------|--------------------|-----------------------------------|
| <i>GE</i>      | 16.7               | 17.6                              | 15.9               | 16.7                              |
| <i>TE</i>      | 62.9               | 61.9                              | 34.0               | 33.3                              |
| <i>SI</i>      | 20.4               | 20.4                              | 50.1               | 50.0                              |

Table S5: Results of the EDX measurement of the crystals at point 10 (Fig. S2)

| <i>ELEMENT</i> | <i>NORM. WT. %</i> | <i>NORM. WT. %<br/>CALCULATED</i> | <i>NORM. AT. %</i> | <i>NORM. AT. %<br/>CALCULATED</i> |
|----------------|--------------------|-----------------------------------|--------------------|-----------------------------------|
| <i>GE</i>      | 16.6               | 17.6                              | 15.8               | 16.7                              |
| <i>TE</i>      | 62.5               | 61.9                              | 34.2               | 33.3                              |
| <i>SI</i>      | 20.9               | 20.4                              | 50.1               | 50.0                              |

Table S6: Average results of the EDX measurement of the crystals at points 1-10

| <i>ELEMENT</i> | $\emptyset$ <i>NORM. WT. %</i> | <i>NORM. WT. %<br/>CALCULATED</i> | $\emptyset$ <i>NORM. AT. %</i> | <i>NORM. AT. %<br/>CALCULATED</i> |
|----------------|--------------------------------|-----------------------------------|--------------------------------|-----------------------------------|
| <i>GE</i>      | 16.8                           | 17.6                              | 15.5                           | 16.7                              |
| <i>TE</i>      | 62.5                           | 61.9                              | 33.6                           | 33.3                              |
| <i>SI</i>      | 20.9                           | 20.4                              | 50.9                           | 50.0                              |

### 3. EDX-measurement of crystals of $[\text{Li}(\text{Et}_2\text{O})(\text{OC}_4\text{H}_7)\text{Ge}_3\text{Te}_4(\text{Tsi})_2]_2$ **3**

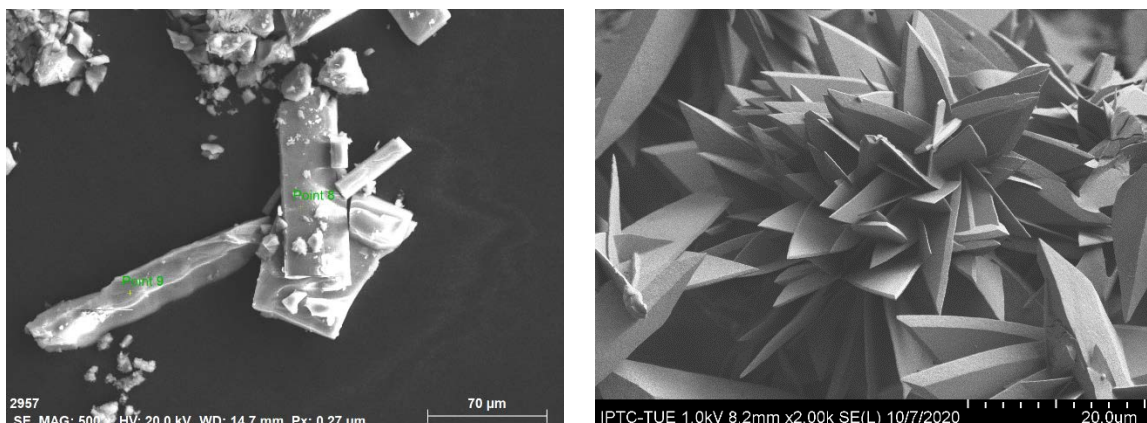

**Fig. S3:** SEM image of a **3** crystallite with the positions 7, 8 where the EDX measurements were performed (left side). SEM image of crystalline **3** with 2000x magnitude (right side). **Device:** HITACHI SU8030 scanning electron microscope with Bruker-EDX.

Table S7: Results of the EDX measurement of the crystallite at point 7 (Fig. S3)

| <i>ELEMENT</i> | <i>NORM. WT. %</i> | <i>NORM. WT. % CALCULATED</i> | <i>NORM. AT. %</i> | <i>NORM. AT. % CALCULATED</i> |
|----------------|--------------------|-------------------------------|--------------------|-------------------------------|
| <i>GE</i>      | 23.6               | 24.3                          | 22.4               | 23.1                          |
| <i>TE</i>      | 57.3               | 56.9                          | 30.9               | 30.8                          |
| <i>SI</i>      | 19.1               | 18.8                          | 46.7               | 46.2                          |

Table S8: Results of the EDX measurement of the crystallite at point 8 (Fig. S3)

| <i>ELEMENT</i> | <i>NORM. WT. %</i> | <i>NORM. WT. % CALCULATED</i> | <i>NORM. AT. %</i> | <i>NORM. AT. % CALCULATED</i> |
|----------------|--------------------|-------------------------------|--------------------|-------------------------------|
| <i>GE</i>      | 24.4               | 24.3                          | 22.9               | 23.1                          |
| <i>TE</i>      | 56.2               | 56.9                          | 30.0               | 30.8                          |
| <i>SI</i>      | 19.4               | 18.8                          | 47.0               | 46.2                          |

Table S9: Average results of the EDX measurement of the crystallite at points 1-10

| <i>ELEMENT</i> | <i>Ø NORM. WT. %</i> | <i>NORM. WT. % CALCULATED</i> | <i>Ø NORM. AT. %</i> | <i>NORM. AT. % CALCULATED</i> |
|----------------|----------------------|-------------------------------|----------------------|-------------------------------|
| <i>GE</i>      | 23.9                 | 24.3                          | 22.5                 | 23.1                          |
| <i>TE</i>      | 56.8                 | 56.9                          | 30.4                 | 30.8                          |
| <i>SI</i>      | 19.4                 | 18.8                          | 47.1                 | 46.2                          |

#### 4. NMR measurements of compounds 1 – 3

##### 4.1 [ $\{(TsiGe)_2GeSe_4\}_2(\mu^2-Se)_2$ ] 1

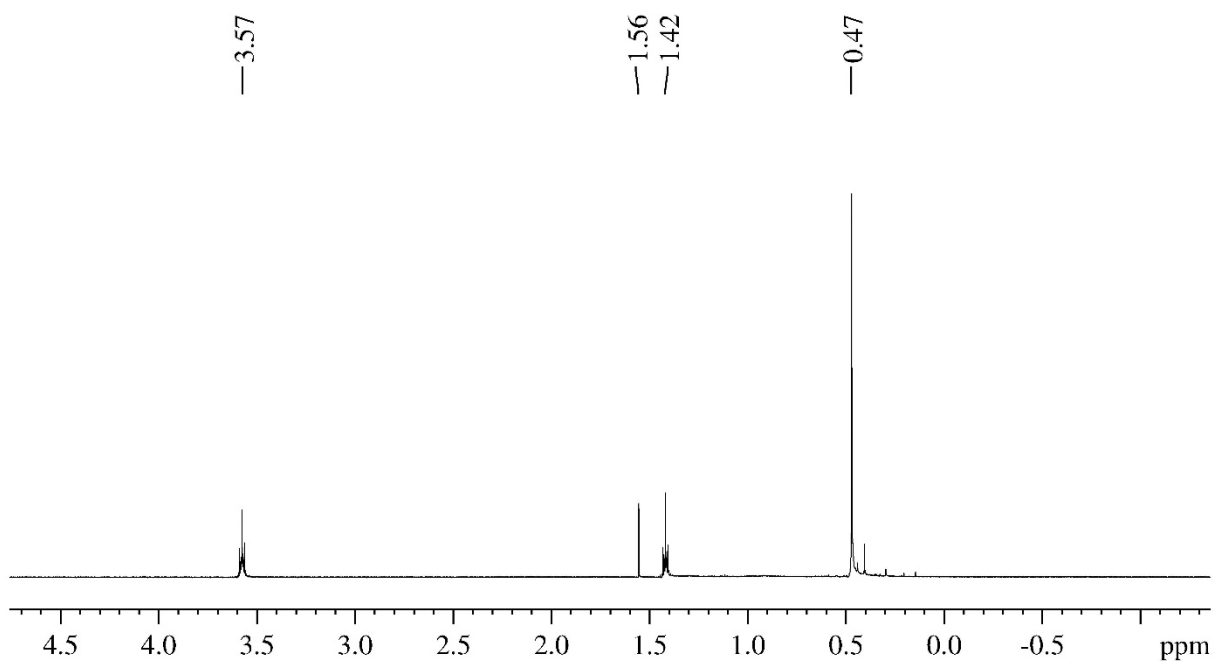

**Fig. S4:**  $^1H$  NMR measurement of dissolved crystals of [ $\{(TsiGe)_2GeSe_4\}_2(\mu^2-Se)_2$ ] 1. **Device:** Bruker AVII+500 spectrometer, External standard  $SiMe_4$ .

$^1H$  NMR (500 MHz,  $C_6D_6$ ) at 25°C:  $\delta$  (ppm):

- 0.47 (s,  $C(SiMe_3)_3$ )
- 1.42 (t, *thf*)
- 1.56 (s, *acetone*)
- 3.57 (t, *thf*)

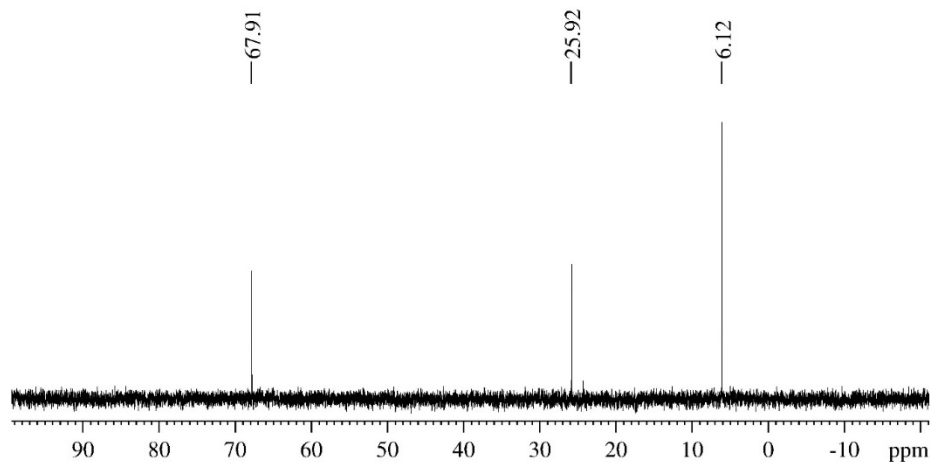

**Fig. S5:**  $^{13}\text{C}$  NMR measurement of dissolved crystals of  $[\{(\text{TsiGe})_2\text{GeSe}_4\}_2(\mu^2\text{-Se})_2]$  **1**. **Device:** Bruker AVII+500 spectrometer, External standard  $\text{SiMe}_4$ .

$^{13}\text{C}$  NMR (125.8 MHz,  $\text{C}_6\text{D}_6$ ) at  $25^\circ\text{C}$ :  $\delta$  (ppm):  
 6.12 (s,  $\text{C}(\text{SiMe}_3)_3$ )  
 25.92 (s, *thf*)  
 67.91 (s, *thf*)

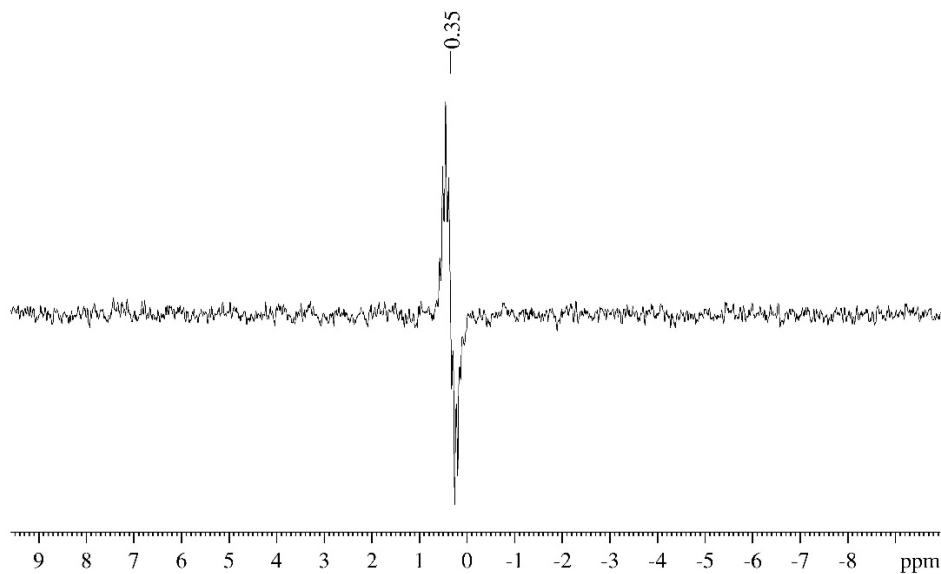

**Fig. S6:**  $^{29}\text{Si}$  NMR (INEPT pulse program) measurement of dissolved crystals of  $[\{(\text{TsiGe})_2\text{GeSe}_4\}_2(\mu^2\text{-Se})_2]$  **1**. **Device:** Bruker AVII+500 spectrometer, External standard  $\text{SiMe}_4$ .

$^{29}\text{Si}$  NMR (99.4 MHz,  $\text{C}_6\text{D}_6$ ) at  $25^\circ\text{C}$ :  $\delta$  (ppm): 0.35 (decet,  $\text{C}(\text{SiMe}_3)_3$ )

## 4.2 $\text{Ge}_2(\mu^2\text{-Te})_2(\text{Tsi})_2(\text{TeH})_2$ **2**

Crystals of **2** are bad soluble in any kind of solvents. Heating it in  $\text{thf-D}_8$  to  $60^\circ\text{C}$  in an ultrasonic bath leads to a slightly red colored solution with red precipitate. It is unclear, if **2** undergoes a decomposition in this case and if only decomposition products are visible via NMR spectroscopy, as the hydrogen atoms of the Te-H groups cannot be identified exactly.

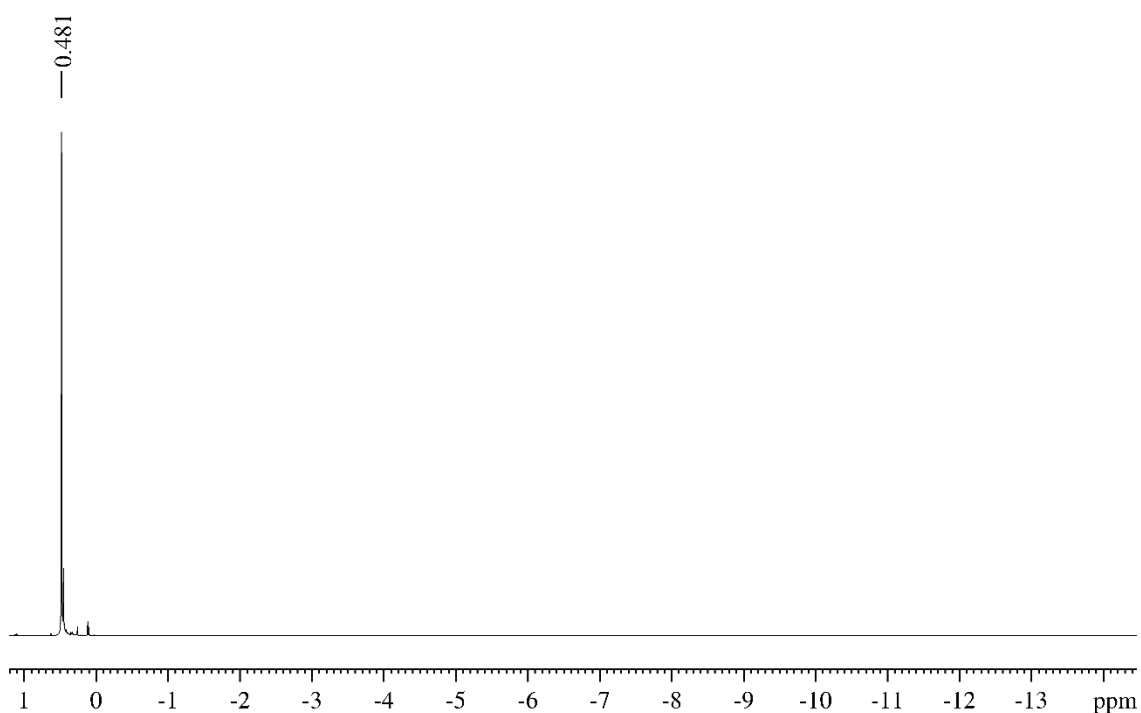

**Fig. S7:**  $^1\text{H}$  NMR measurement of dissolved crystals of  $\text{Ge}_2(\mu^2\text{-Te})_2(\text{Tsi})_2(\text{TeH})_2$  **2**. **Device:** Bruker AVIIIHD-300 spectrometer, External standard  $\text{SiMe}_4$ .

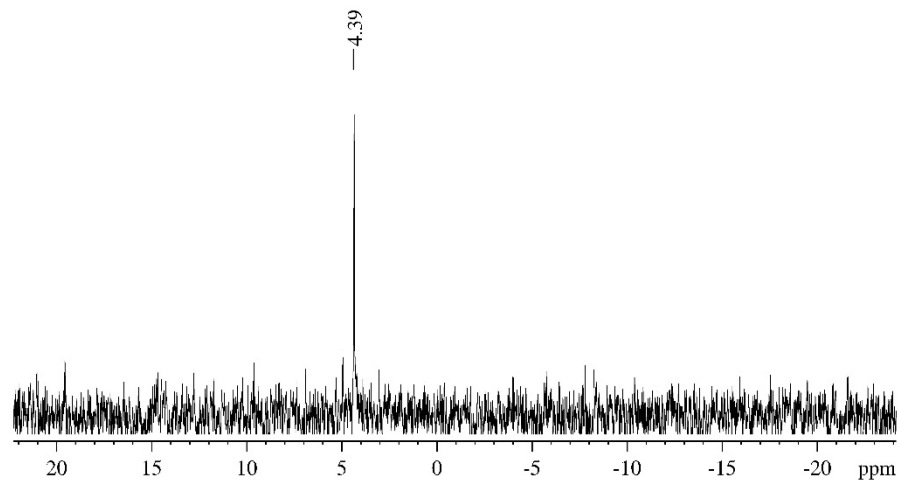

**Fig. S8:**  $^{13}\text{C}$  NMR measurement of dissolved crystals of  $\text{Ge}_2(\mu^2\text{-Te})_2(\text{Tsi})_2(\text{TeH})_2$  **2**. **Device:** Bruker AVIIIHD-300 spectrometer, External standard  $\text{SiMe}_4$ .

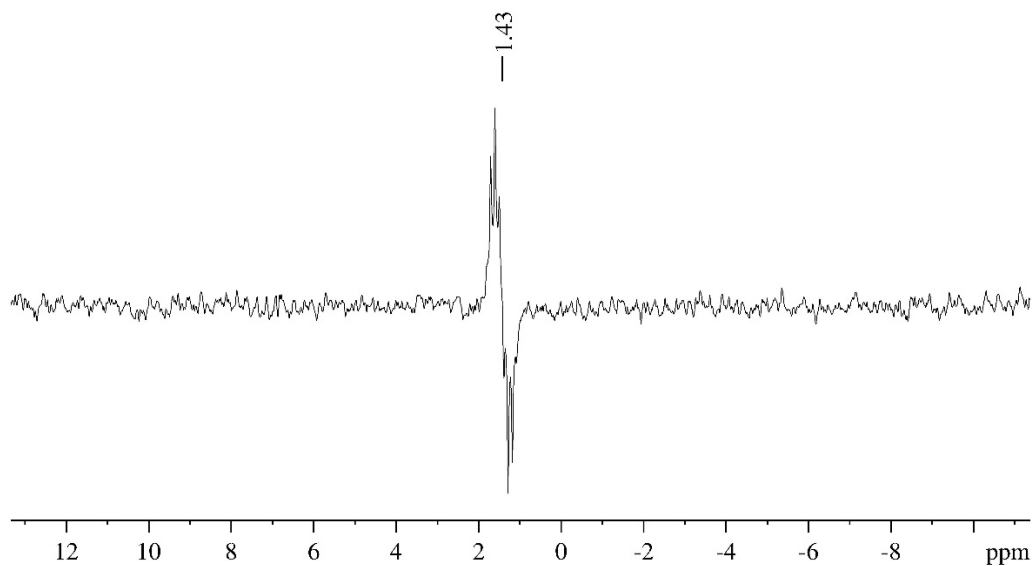

**Fig. S9:**  $^{29}\text{Si}$  NMR (INEPT pulse program) measurement of dissolved crystals of  $\text{Ge}_2(\mu^2\text{-Te})_2(\text{Tsi})_2(\text{TeH})_2$  **2**. **Device:** Bruker AVIIIHD-300 spectrometer, External standard  $\text{SiMe}_4$ .



4.3 [Li(Et<sub>2</sub>O)(OC<sub>4</sub>H<sub>7</sub>)Ge<sub>3</sub>Te<sub>4</sub>(Tsi)<sub>2</sub>]<sub>2</sub> **3**

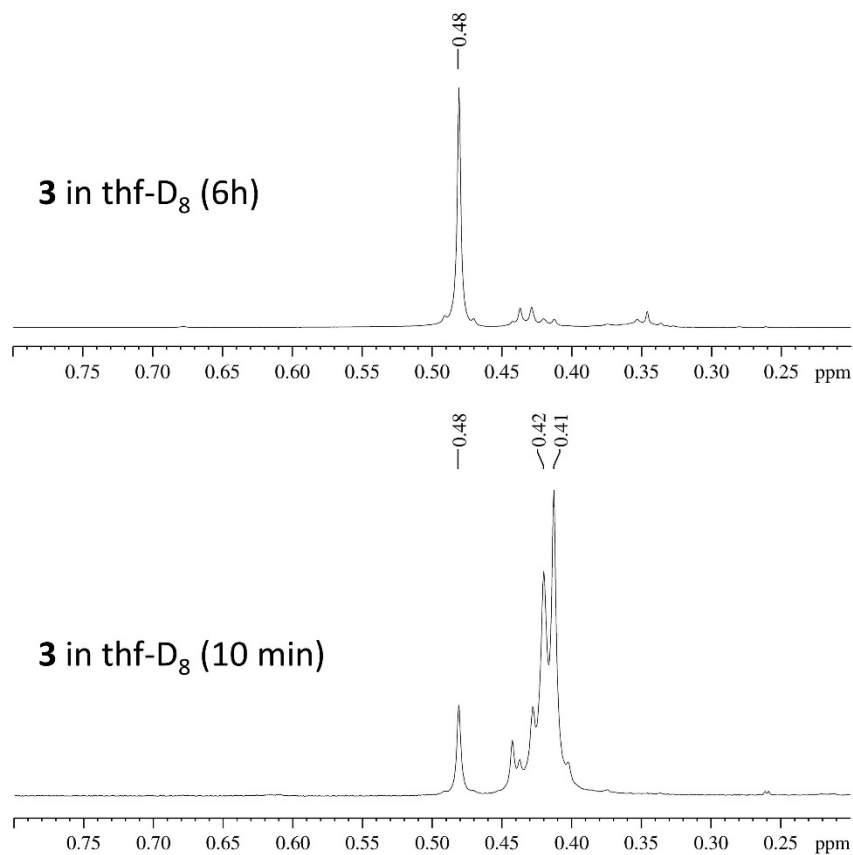

**Fig. S10:** <sup>1</sup>H NMR measurement of dissolved crystals of [Li(Et<sub>2</sub>O)(OC<sub>4</sub>H<sub>7</sub>)Ge<sub>3</sub>Te<sub>4</sub>(Tsi)<sub>2</sub>]<sub>2</sub> **3** after 10 minutes and 6 hours in thf-D<sub>8</sub>. **Device:** Bruker AVIIIHD-300 spectrometer, External standard SiMe<sub>4</sub>.

## 5. NMR measurement of reaction mixture $\text{GeCl}_2 \cdot \text{dioxane} / \text{LiSeTsi}$

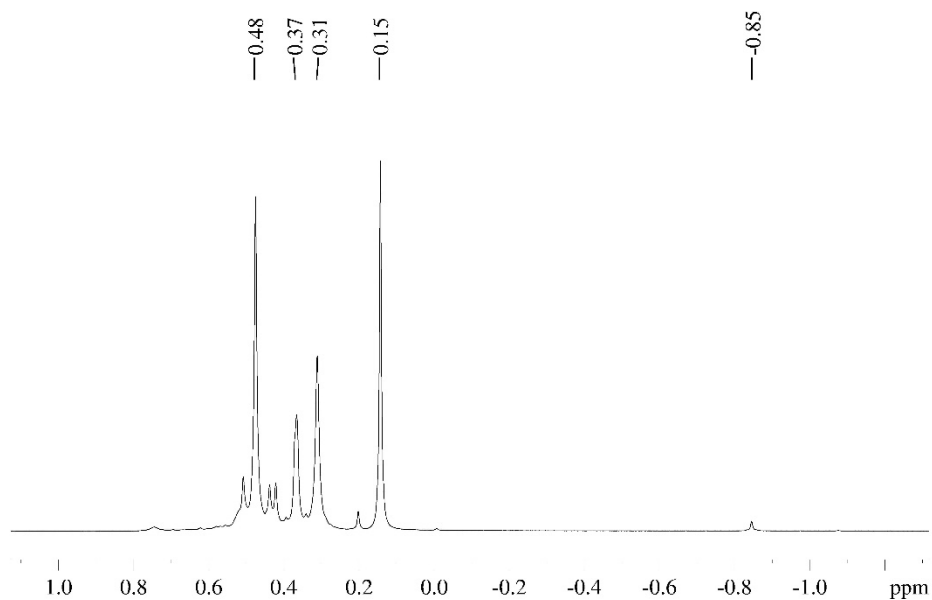

**Fig. S11:**  $^1\text{H}$  NMR measurement of the reaction mixture  $\text{GeCl}_2 \cdot \text{dioxane} / \text{LiSeTsi}$  after stirring at  $0^\circ\text{C}$  for 1h. **Device:** Bruker AVII+400 spectrometer, External standard  $\text{SiMe}_4$ .

$^1\text{H}$  NMR (400 MHz,  $\text{C}_6\text{D}_6$ ) at  $25^\circ\text{C}$ :  $\delta$  (ppm):

- 0.85 (s, 1H,  $\text{HC}(\text{SiMe}_3)_3$ )
- 0.15 (s, 27H,  $\text{HC}(\text{SiMe}_3)_3$ )
- 0.31 (s,  $(\text{Me}_3\text{Si})_3\text{C}-\text{Se}-\text{Se}-\text{Se}-\text{C}(\text{SiMe}_3)_3$ )
- 0.37 (s,  $(\text{Me}_3\text{Si})_3\text{C}-\text{Se}-\text{Se}-\text{C}(\text{SiMe}_3)_3$ )

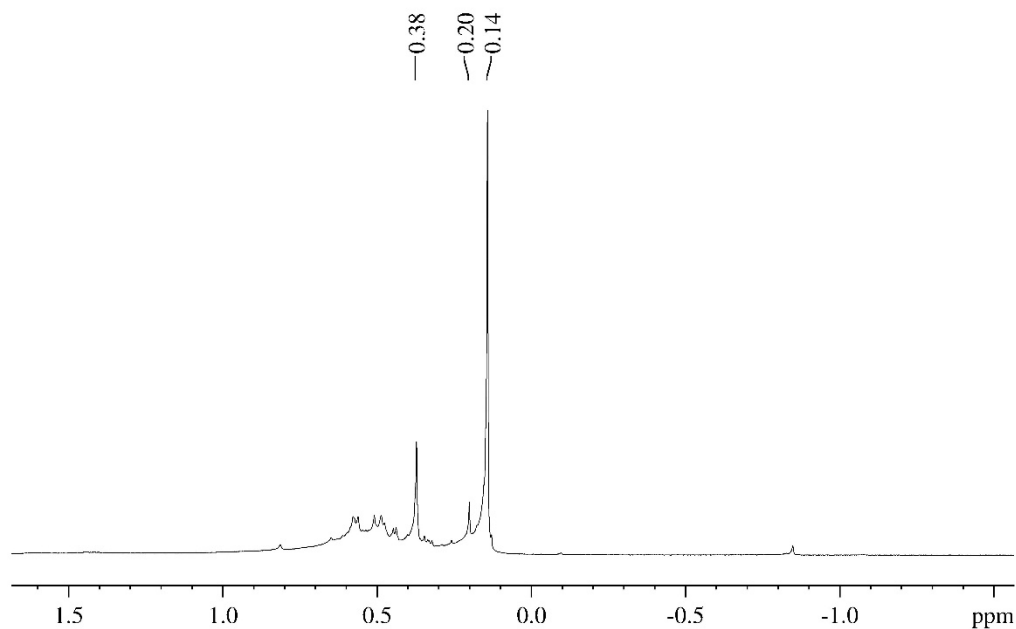

**Fig. S12:**  $^1\text{H}$  NMR measurement of the reaction mixture  $\text{GeCl}_2\cdot\text{dioxane}/\text{LiSeTsi}$  after stirring at RT for 12h. **Device:** Bruker DRX-250 spectrometer, External standard  $\text{SiMe}_4$ .

|                                                                                            |                                                                        |
|--------------------------------------------------------------------------------------------|------------------------------------------------------------------------|
| $^1\text{H}$ NMR (250 MHz, $\text{C}_6\text{D}_6$ ) at $25^\circ\text{C}$ : $\delta$ (ppm) | -0.85 (s, 1H, $\text{HC}(\text{SiMe}_3)_3$ )                           |
|                                                                                            | 0.15 (s, 27H, $\text{HC}(\text{SiMe}_3)_3$ )                           |
|                                                                                            | 0.20 (s, $\text{HSeC}(\text{SiMe}_3)_3$ )                              |
|                                                                                            | 0.38 (s, $(\text{Me}_3\text{Si})_3\text{C-Se-Se-C}(\text{SiMe}_3)_3$ ) |

## 6. Characterization of Tsi-Te-Te-Tsi

### 6.1 Synthesis

**Synthesis of Tsi-Te-Te-Tsi as a byproduct:** (thf)<sub>2</sub>LiTeC(SiMe<sub>3</sub>)<sub>3</sub> (2.33 g, 4.57 mmol) was dissolved in thf and cooled to  $-78^{\circ}\text{C}$  and GeCl<sub>2</sub>·dioxane (0.529 g, 2.28 mmol) was given to the solution while stirring. The solution was allowed to reach room temperature and was stirred overnight to give a dark red reaction solution. After that, all volatiles were removed in vacuum and the remaining solid was extracted with toluene. Tsi-Te-Te-Tsi was obtained as blue crystals at  $-28^{\circ}\text{C}$ . **<sup>1</sup>H NMR** (300 MHz, thf-D<sub>8</sub>):  $\delta = 0.39$  (s, SiMe<sub>3</sub>) ppm. **<sup>13</sup>C{<sup>1</sup>H} NMR** (75.5 MHz, thf-D<sub>8</sub>):  $\delta = 4.90$  (s, SiMe<sub>3</sub>) ppm. **<sup>29</sup>Si NMR** (59.6 MHz, thf-D<sub>8</sub>):  $\delta = 5.27$  (decet, SiMe<sub>3</sub>) ppm.

## 6.2 Molecular structure

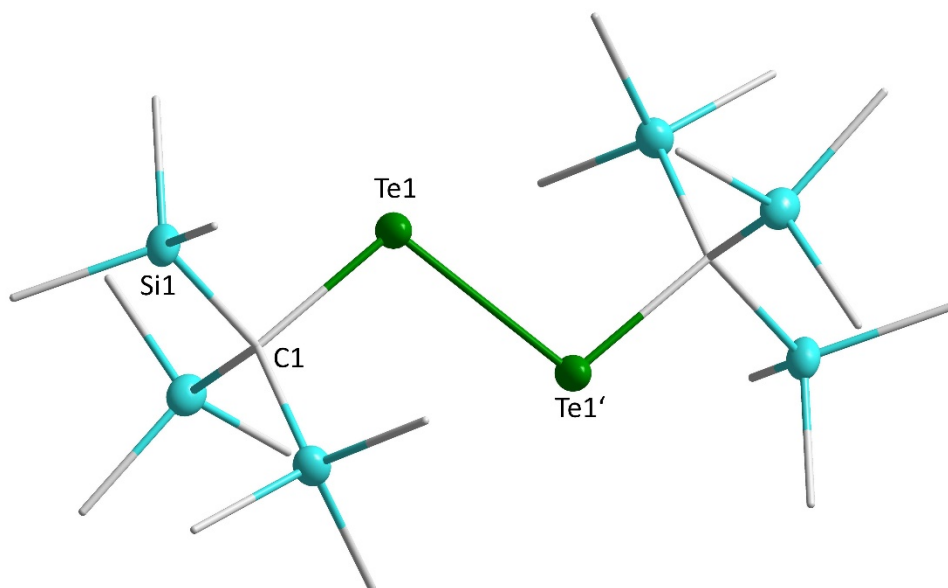

**Figure S13:** Molecular structure of Tsi-Te-Te-Tsi in the solid state. Hydrogen atoms are omitted for clarity. Thermal ellipsoids are set at 50% probability. Selected bond lengths [pm], angles [°]: Te1-Te1' 277.84(4), Te1-C1 220.2(2); C1-Te1-Te1' 103.69(7).

### 6.3 NMR measurements

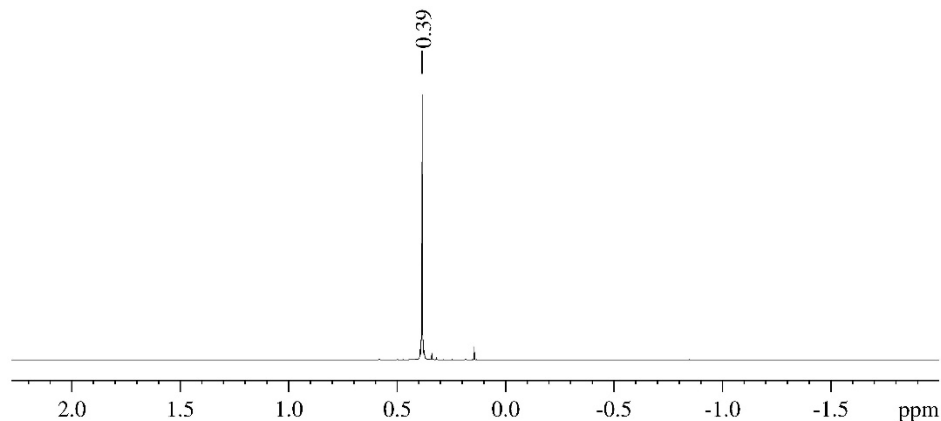

**Fig. S14:**  $^1\text{H}$  NMR measurement of dissolved crystals of Tsi-Te-Te-Tsi. **Device:** Bruker AVIIIHD-300 spectrometer, External standard  $\text{SiMe}_4$ .

$^1\text{H}$  NMR (300 MHz,  $\text{C}_6\text{D}_6$ ) at 25°C:  $\delta$  (ppm): 0.39 (s,  $(\text{Me}_3\text{Si})_3\text{C-Te-Te-C}(\text{SiMe}_3)_3$ )

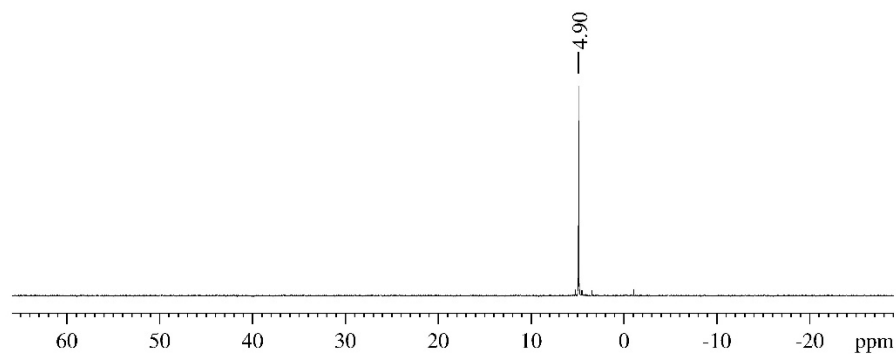

**Fig. S15:**  $^{13}\text{C}$  NMR measurement of dissolved crystals of Tsi-Te-Te-Tsi. **Device:** Bruker AVIIIHD-300 spectrometer, External standard  $\text{SiMe}_4$ .

$^{13}\text{C}$  NMR (75.5 MHz,  $\text{C}_6\text{D}_6$ ) at 25°C:  $\delta$  (ppm): 4.90 (s,  $(\text{Me}_3\text{Si})_3\text{C-Te-Te-C}(\text{SiMe}_3)_3$ )

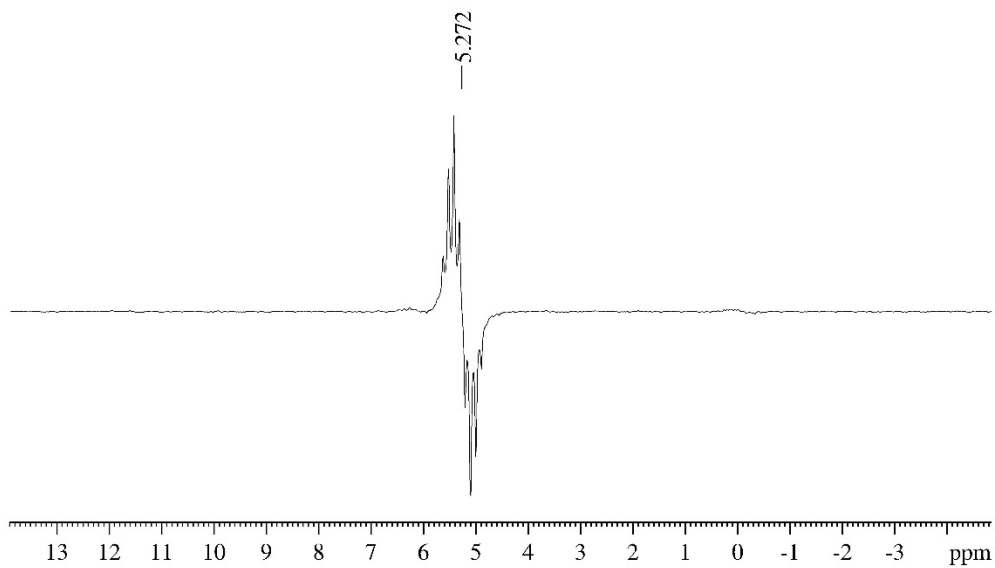

**Fig. S16:**  $^{29}\text{Si}$  NMR (INEPT pulse program) measurement of dissolved crystals of Tsi-Te-Te-Tsi. **Device:** Bruker AVIIIHD-300 spectrometer, External standard  $\text{SiMe}_4$ .

$^{29}\text{Si}$  NMR (59.6 MHz,  $\text{C}_6\text{D}_6$ ) at 25°C:  $\delta$  (ppm): 5.27 (decet,  $(\text{Me}_3\text{Si})_3\text{C-Te-Te-C}(\text{SiMe}_3)_3$ )

## 7. Crystallographic data of Tsi-Te-Te-Tsi:

Table S10: Crystallographic details for Tsi-Te-Te-Tsi

|                                       | <b>Tsi-Te-Te-Tsi</b>                     |
|---------------------------------------|------------------------------------------|
| Empirical formula                     | $C_{20}H_{54}Si_6Te_2$                   |
| Formula weight                        | 718.37                                   |
| T [K]                                 | 150                                      |
| Crystal system                        | monoclinic                               |
| Space group                           | $C2/c$                                   |
| a [pm]                                | 1618.91(11)                              |
| b [pm]                                | 893.21(5)                                |
| c [pm]                                | 2314.04(14)                              |
| $\alpha$ [°]                          | 90                                       |
| $\beta$ [°]                           | 98.483(2)                                |
| $\gamma$ [°]                          | 90                                       |
| V [Å <sup>3</sup> ]                   | 3309.6(4)                                |
| Z                                     | 4                                        |
| $\rho_{calc}$ [g/cm <sup>3</sup> ]    | 1.442                                    |
| $\mu$ [mm <sup>-1</sup> ]             | 1.987                                    |
| F(000)                                | 1448                                     |
| Crystal size [mm <sup>3</sup> ]       | 0.225x0.076x0.037                        |
| 2 $\theta$ [°]                        | 5.088 – 52.95                            |
| Index range                           | -20 ≤ h ≤ 20, -11 ≤ k ≤ 11, -28 ≤ l ≤ 28 |
| Reflections collected                 | 46797                                    |
| Independent reflections               | 3433 [Rint = 0.0537]                     |
| Data/restraints/parameters            | 3433/0/136                               |
| GooF                                  | 1.102                                    |
| R [I ≥ 2 $\sigma$ (I)]                | R1 = 0.0266, wR2 = 0.0619                |
| R [all data]                          | R1 = 0.0316, wR2 = 0.0644                |
| Largest peak/hole [e/Å <sup>3</sup> ] | 0.84/-0.58                               |
| CCDC                                  | 2049718                                  |



## 8. Quantum chemical calculations

### 8.1. General Information

Quantum-chemical calculations were carried out with the RI-DFT version of the Turbomole program package by employing the BP86-functional. The basis sets were of SVP quality. Thermodynamic properties were calculated using correction was applied using Grimme's DFT-D3-BJ damping correction.<sup>[1]</sup>

### 8.2. $\text{Ge}_2\text{Se}_2(\text{SeTsi})_4$

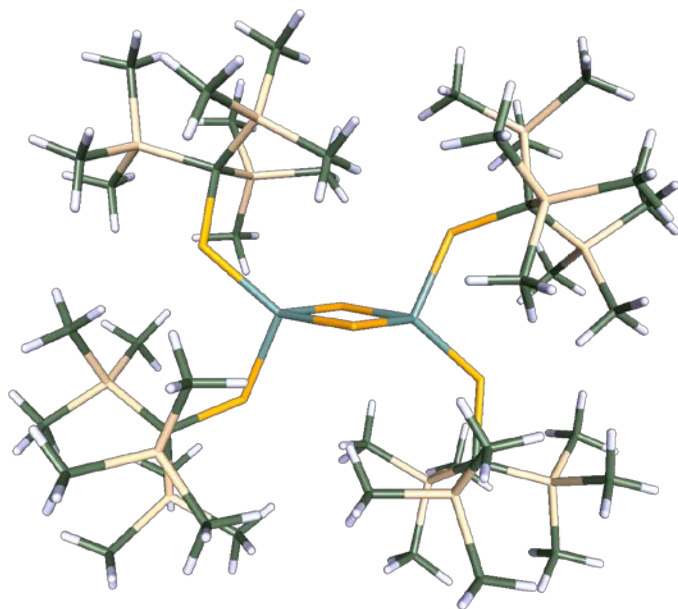

Figure S17: Geometry optimized structure

|                                |                                         |
|--------------------------------|-----------------------------------------|
| Point group:                   | $C_1$                                   |
| Energy:                        | -23625.6849176667 Hartree               |
| Enthalpy:                      | 3824.13 $\text{kJ mol}^{-1}$            |
| Entropy:                       | 2.31 $\text{kJ mol}^{-1} \text{K}^{-1}$ |
| Lowest vibrational eigenvalue: | 10.45 $\text{cm}^{-1}$                  |
| HOMO-LUMO-gap:                 | 2.074 eV                                |

## Atom coordinates:

|                                  |                                 |                                 |
|----------------------------------|---------------------------------|---------------------------------|
| Se -2.729624 -1.146638 -0.933962 | C 1.127705 -6.550441 1.296045   | H -3.467568 -4.649890 -0.713243 |
| Ge -1.436954 0.466206 0.263515   | C 1.758288 -3.877108 2.692277   | H -4.030803 -5.061591 -2.370360 |
| Se -2.799569 2.345773 0.830603   | C -0.635067 -4.132264 0.851356  | H 0.785359 -7.072101 0.377538   |
| C -2.010333 4.196997 0.618832    | C 2.585079 -4.227051 -3.574653  | H 0.400442 -6.786598 2.105992   |
| Se 0.321054 0.554551 -1.350051   | H -3.044170 7.201819 2.008625   | H 2.107463 -6.980400 1.593359   |
| Ge 1.607805 -0.492782 0.404993   | H -4.315205 7.594909 0.805921   | H -1.164679 -4.404714 1.791484  |
| Se -0.138586 -0.564641 2.057378  | H -2.595404 7.510305 0.293768   | H -0.758890 -3.037857 0.715136  |
| Se 2.983771 -2.296694 -0.302058  | H -5.808742 5.314932 1.825730   | H -1.145911 -4.648347 0.012580  |
| C 2.273112 -4.184536 -0.423187   | H -5.290311 3.603222 1.724347   | H 1.480529 -2.803069 2.733957   |
| Si 3.155602 1.327568 0.480426    | H -4.538188 4.695947 2.933741   | H 1.246709 -4.382695 3.542711   |
| C 4.827912 1.247257 1.624839     | H -4.737384 3.952512 -1.307308  | H 2.851973 -3.951882 2.851959   |
| C -4.675619 -1.443369 -0.457990  | H -4.040373 5.491225 -1.925850  | H 4.001036 -5.926298 2.066865   |
| Si -3.671205 5.209811 0.590001   | H -5.570931 5.512666 -0.987634  | H 4.844266 -4.350605 1.845494   |
| Si -0.949410 4.565858 2.178794   | H 0.516280 6.421239 2.958112    | H 5.628364 -5.870931 1.310163   |
| Si -1.045030 4.431470 -1.036845  | H -0.704930 7.073670 1.815386   | H 3.509225 -6.869712 -2.193920  |
| Si 3.952405 -5.159296 -0.372900  | H 0.737659 6.198785 1.195704    | H 2.951822 -7.487976 -0.599374  |
| Si 1.373445 -4.327628 -2.117452  | H -2.667436 5.569640 3.781104   | H 4.705345 -7.443869 -0.986183  |
| Si 1.166075 -4.659334 1.073128   | H -1.319502 4.744202 4.629670   | H 5.655131 -3.346665 -0.890341  |
| Si 4.409712 0.800902 3.443170    | H -2.629969 3.768037 3.884830   | H 6.205421 -4.977660 -1.395189  |
| Si 5.375672 3.104304 1.450959    | H 1.024749 3.015309 1.690874    | H 5.036011 -4.068728 -2.413055  |
| Si 6.145282 0.054121 0.866392    | H 0.883581 3.494716 3.412271    | H 0.590192 -2.001579 -2.520207  |
| Si -5.759018 0.094792 -0.904487  | H -0.195389 2.232028 2.740244   | H -0.491637 -3.208896 -3.292457 |
| Si -5.038534 2.898143 -1.698633  | H -1.757049 2.284831 -2.196948  | H -0.605310 -2.886051 -1.531479 |
| Si -4.851921 -2.001155 1.368147  | H -1.132425 3.511122 -3.345226  | H 1.998448 -4.224713 -4.521353  |
| C -3.356358 7.047536 0.953283    | H -2.800785 3.652178 -2.685436  | H 3.311955 -5.064927 -3.632097  |
| C -4.572895 5.025717 -1.070506   | H -0.676690 6.930103 -0.837195  | H 3.152444 -3.271599 -3.530344  |
| C -4.927017 4.637094 1.897932    | H -2.128095 6.612651 -1.854609  | H 1.127270 -6.899453 -2.084963  |
| C 0.302117 3.198768 2.511449     | H -0.484841 6.340061 -2.519214  | H -0.379729 -6.092142 -1.525613 |
| C -0.022379 6.219101 2.004564    | H 1.319362 4.834020 -0.248246   | H 0.031956 -6.109648 -3.268515  |
| C -2.005030 4.678186 3.754372    | H 1.260310 4.105611 -1.888580   | H 7.018261 2.906462 -0.503457   |
| C -1.109985 6.249890 -1.601623   | H 1.025272 3.070939 -0.453412   | H 5.331712 3.187155 -1.062291   |
| C -1.757905 3.369724 -2.435062   | H -4.032074 1.620627 -1.867255  | H 6.286701 4.541593 -0.370167   |
| C 0.807044 4.072014 -0.871925    | H -5.650311 1.911863 -2.603076  | H 6.230112 3.603798 3.779033    |
| C -7.509109 -0.405753 -1.471685  | H -4.641775 0.518510 -3.145897  | H 7.551024 2.909695 2.773140    |
| C -6.124180 1.254194 0.561880    | H -8.075764 0.533707 -1.666363  | H 7.027023 4.609948 2.526346    |
| C -4.941109 1.122484 -2.264724   | H -7.543732 -1.014219 -2.398816 | H 4.352518 5.349498 1.734947    |
| C -6.663293 -3.784389 -1.270463  | H -8.505009 -0.956360 -0.671837 | H 3.302202 4.127891 2.535661    |
| C -3.680900 -4.230204 -1.715862  | H -6.299000 2.274442 0.153993   | H 3.262868 4.308919 0.754875    |
| C -5.099802 -2.266717 -3.490473  | H -7.048201 0.947359 1.097492   | H 8.177090 1.619143 0.852290    |
| C -3.840866 -0.904137 2.539448   | H -5.306430 1.334056 1.303912   | H 8.083166 0.675658 2.381138    |
| C -4.226801 -3.762579 1.680586   | H -4.257167 -3.955206 2.777296  | H 8.624456 -0.116959 0.866384   |
| C -6.679674 -1.970664 1.896314   | H -3.174945 -3.872505 1.347118  | H 6.832325 -2.322564 1.045372   |
| C 6.077213 3.451458 -0.280494    | H -4.840157 -4.544804 1.184939  | H 6.223539 -1.780681 2.643197   |
| C 6.668873 3.581065 2.758351     | H -3.916698 0.184685 2.334604   | H 5.065673 -2.181023 1.323625   |
| C 3.928881 4.322767 1.643225     | H -2.765976 -1.190855 2.491602  | H 5.011387 -0.524251 -1.308208  |
| C 3.326039 -0.749568 3.509778    | H -4.177936 -1.069392 3.587866  | H 6.798141 -0.714482 -1.411058  |
| C 3.440380 2.148716 4.353841     | H -7.092031 -0.943174 1.968480  | H 6.051973 0.921923 -1.515259   |
| C 5.998306 0.505474 4.451671     | H -7.321335 -2.552337 1.201209  | H 5.704143 0.298218 5.505841    |
| C 6.046495 -1.715719 1.549607    | H -6.766203 -2.437914 2.903536  | H 6.594505 -0.360563 4.096448   |
| C 5.981739 -0.067349 -1.017037   | H -5.914691 -1.541432 -3.692892 | H 6.660347 1.396334 4.458400    |
| C 7.912697 0.631182 1.284163     | H -5.242312 -3.136932 -4.170714 | H 4.010449 3.091299 4.496473    |
| C 0.103719 -2.989132 -2.377181   | H -4.135043 -1.783671 -3.760349 | H 3.167832 1.761851 5.362203    |
| C 0.463919 -6.024536 -2.245503   | H -7.537322 -3.104390 -1.222942 | H 2.498242 2.379364 3.815456    |
| C 5.325512 -4.294374 -1.366941   | H -6.863350 -4.541657 -2.062309 | H 3.575438 -1.491322 2.725248   |
| C 4.651023 -5.341616 1.383151    | H -6.591125 -4.325684 -0.302769 | H 2.257613 -0.461736 3.387643   |
| C 3.741881 -6.898478 -1.108223   | H -2.726101 -3.848921 -2.135377 | H 3.418663 -1.253781 4.497535   |

### 8.3. Compound C

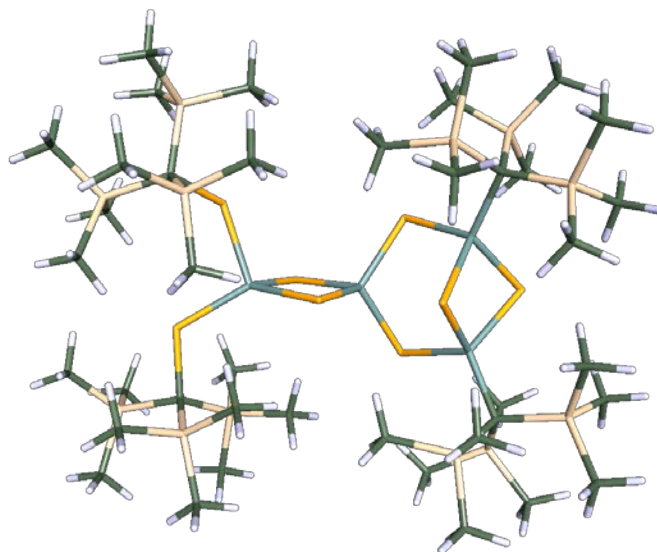

Figure S18: Geometry optimized structure

|                                |                                           |
|--------------------------------|-------------------------------------------|
| Point group:                   | C <sub>1</sub>                            |
| Energy:                        | -32583.1360890315 Hartree                 |
| Enthalpy:                      | 3856.92 kJ mol <sup>-1</sup>              |
| Entropy:                       | 2.44 kJ mol <sup>-1</sup> K <sup>-1</sup> |
| Lowest vibrational eigenvalue: | 9.10 cm <sup>-1</sup>                     |
| HOMO-LUMO-gap:                 | 2.156 eV                                  |

#### Atom coordinates:

|                                  |                                  |                                 |
|----------------------------------|----------------------------------|---------------------------------|
| Se 0.703672 0.505003 -3.173705   | Si 3.189615 -2.510791 -3.447704  | Ge -1.657332 -0.709399 1.741564 |
| Ge -1.413109 1.006648 -4.248852  | Si 2.396379 -2.119558 -6.522278  | Se -1.171328 -1.781621 3.808710 |
| Ge 0.254079 -1.661160 -4.190354  | Se -0.156662 -0.030375 -0.050248 | Se -3.170991 0.996986 2.418050  |
| Se -1.245478 -0.787109 -5.861965 | Se -3.260373 -1.886288 0.357801  | C -0.011239 -3.430900 3.770120  |
| Se -3.167264 0.386732 -2.713335  | C -0.506214 -4.715281 -5.659266  | C -2.522479 2.386405 3.750372   |
| C -1.714754 2.857997 -4.888560   | C 2.409514 -5.612304 -5.995193   | Si -0.394046 -4.152922 5.529659 |
| Se -1.052601 -2.907603 -2.599548 | C 1.203334 -5.511665 -3.242572   | Si -0.590230 -4.643573 2.392821 |
| C 1.807105 -2.739405 -4.784960   | C 2.496485 -2.552240 -1.686092   | Si 1.816514 -2.852602 3.606115  |
| Ge -1.864227 -1.055208 -1.370126 | C 4.509015 -3.873428 -3.577291   | Si -0.787030 3.067360 3.306897  |
| Si -1.375013 4.065914 -3.410984  | C 4.106987 -0.856409 -3.625176   | Si -3.917231 3.705167 3.439077  |
| Si -3.572652 2.930270 -5.450402  | C 2.418060 -0.236615 -6.653741   | Si -2.577763 1.700255 5.557157  |
| Si -0.526606 3.258504 -6.370138  | C 4.156194 -2.720132 -6.921257   | C -0.555216 -2.797801 6.855511  |
| Si 1.233476 -4.589431 -4.905567  | C 1.260604 -2.695114 -7.933850   | C 0.975276 -5.349705 6.077682   |

|             |           |           |             |           |           |             |           |           |
|-------------|-----------|-----------|-------------|-----------|-----------|-------------|-----------|-----------|
| C -2.047166 | -5.082516 | 5.583268  | H -0.351615 | -6.860861 | 3.616429  | H -2.032459 | 2.535709  | -8.299908 |
| C -2.481939 | -4.778660 | 2.297841  | H -0.147761 | -3.041617 | 0.465487  | H 1.790797  | 3.745706  | -5.520658 |
| C 0.084280  | -6.396046 | 2.706040  | H 1.182585  | -4.226510 | 0.643855  | H 1.438194  | 1.999959  | -5.333353 |
| C 0.081359  | -4.099490 | 0.710571  | H -0.381126 | -4.724060 | -0.085236 | H 1.819190  | 2.664496  | -6.952990 |
| C 2.098687  | -1.640738 | 2.182614  | H -2.271800 | -5.330774 | 6.645588  | H 0.117346  | 5.220919  | -7.718940 |
| C 2.978441  | -4.328840 | 3.301404  | H -2.039084 | -6.033392 | 5.010209  | H -1.517366 | 5.535506  | -7.047835 |
| C 2.397161  | -1.930258 | 5.162887  | H -2.877659 | -4.452252 | 5.199591  | H -0.058454 | 5.720439  | -6.009735 |
| H 1.639243  | -2.239405 | -8.877132 | H -1.492299 | -2.212471 | 6.730395  | C -0.755573 | 3.974367  | 1.647203  |
| H 1.230153  | -3.794560 | -8.080793 | H -0.604398 | -3.296619 | 7.850872  | C 0.503994  | 1.684282  | 3.144335  |
| H 0.219840  | -2.331670 | -7.788965 | H 0.291564  | -2.082976 | 6.873004  | C -0.174868 | 4.275736  | 4.645693  |
| H 4.918147  | -2.255442 | -6.259951 | H 1.612340  | -0.664475 | 2.386071  | C -5.569596 | 3.122704  | 4.177197  |
| H 4.275446  | -3.821013 | -6.867798 | H 3.193943  | -1.454487 | 2.098046  | C -4.275906 | 3.977834  | 1.590313  |
| H 4.387680  | -2.404818 | -7.964264 | H 1.740049  | -2.006436 | 1.200697  | C -3.477560 | 5.407671  | 4.159127  |
| H 2.438070  | -5.286548 | -7.055305 | H -2.983647 | -3.856998 | 2.661497  | C -3.864649 | 0.322490  | 5.739606  |
| H 3.447734  | -5.611126 | -5.601898 | H -2.789895 | -4.927815 | 1.240208  | C -0.925182 | 0.989308  | 6.174754  |
| H 2.045252  | -6.664819 | -5.978167 | H -2.858643 | -5.636378 | 2.894217  | C -2.974403 | 3.093587  | 6.796310  |
| H 4.114260  | -4.883807 | -3.342044 | C -2.054131 | 3.489556  | -1.743620 | H 0.596645  | 1.389283  | 2.075787  |
| H 5.305852  | -3.646305 | -2.832878 | C 0.483596  | 4.326487  | -3.117308 | H 1.503136  | 2.053303  | 3.467571  |
| H 4.985027  | -3.912327 | -4.578604 | C -2.138712 | 5.773796  | -3.753578 | H 0.270794  | 0.775864  | 3.734352  |
| H 3.419191  | 0.014708  | -3.568595 | C -4.094578 | 1.311255  | -6.295834 | H -1.347609 | 4.914282  | 1.637951  |
| H 4.687585  | -0.776071 | -4.568345 | C -4.803469 | 3.219356  | -4.031343 | H 0.298599  | 4.230608  | 1.395473  |
| H 4.825215  | -0.771798 | -2.778189 | C -3.892872 | 4.347852  | -6.673835 | H -1.138857 | 3.304068  | 0.850020  |
| H 0.794588  | -6.530076 | -3.434128 | C -1.010346 | 2.299688  | -7.935794 | H 0.809425  | 4.682072  | 4.318489  |
| H 2.216704  | -5.635023 | -2.805876 | C 1.293055  | 2.875550  | -5.996355 | H -0.020359 | 3.785518  | 5.630045  |
| H 0.559599  | -5.026817 | -2.480141 | C -0.522167 | 5.109090  | -6.813176 | H -0.860083 | 5.134801  | 4.795692  |
| H -1.293454 | -4.289552 | -4.998657 | H 1.039786  | 3.365986  | -3.053092 | H -4.875798 | 4.911793  | 1.487787  |
| H -0.749752 | -5.791458 | -5.811022 | H 0.602605  | 4.847691  | -2.140490 | H -3.361457 | 4.084424  | 0.973728  |
| H -0.581275 | -4.208399 | -6.642940 | H 0.967561  | 4.953139  | -3.895604 | H -4.869101 | 3.143482  | 1.159368  |
| H 1.380982  | 0.156216  | -6.666127 | H -3.138954 | 3.266827  | -1.741940 | H -2.655640 | 5.891152  | 3.587886  |
| H 2.901128  | 0.047333  | -7.616436 | H -1.872421 | 4.328179  | -1.034690 | H -4.375682 | 6.060124  | 4.067065  |
| H 2.967962  | 0.263850  | -5.833319 | H -1.530185 | 2.593842  | -1.345277 | H -3.188555 | 5.376530  | 5.229206  |
| H 1.814745  | -1.703706 | -1.457388 | H -1.820838 | 6.458082  | -2.934141 | H -5.857756 | 2.135608  | 3.753446  |
| H 3.350716  | -2.484753 | -0.974626 | H -1.803220 | 6.216613  | -4.712918 | H -5.564409 | 3.032681  | 5.283571  |
| H 1.937277  | -3.483317 | -1.467556 | H -3.248882 | 5.752221  | -3.753341 | H -6.363725 | 3.852224  | 3.898764  |
| H 3.423043  | -1.537798 | 4.979563  | H -5.825737 | 3.213028  | -4.473953 | H -3.927373 | 0.020049  | 6.809903  |
| H 2.437369  | -2.564543 | 6.073632  | H -4.663178 | 4.197804  | -3.526272 | H -3.572517 | -0.569407 | 5.143308  |
| H 1.738080  | -1.059107 | 5.372094  | H -4.772112 | 2.428247  | -3.253434 | H -4.876257 | 0.634239  | 5.405467  |
| H 2.809484  | -4.776096 | 2.297662  | H -3.649123 | 5.338825  | -6.236354 | H -1.078050 | 0.654475  | 7.225929  |
| H 2.879703  | -5.133377 | 4.058820  | H -4.981442 | 4.342031  | -6.909636 | H -0.098256 | 1.730210  | 6.175841  |
| H 4.030218  | -3.963385 | 3.328587  | H -3.342803 | 4.242924  | -7.631997 | H -0.600431 | 0.104604  | 5.589040  |
| H 1.138742  | -6.167874 | 5.345674  | H -4.125501 | 0.451649  | -5.589736 | H -2.958167 | 2.659689  | 7.822034  |
| H 0.668142  | -5.812985 | 7.042846  | H -3.431662 | 1.032961  | -7.142046 | H -3.970448 | 3.560270  | 6.647415  |
| H 1.945580  | -4.835875 | 6.246028  | H -5.124458 | 1.441731  | -6.699567 | H -2.208392 | 3.897918  | 6.763476  |
| H -0.197090 | -7.037617 | 1.839798  | H -0.293936 | 2.570369  | -8.744256 |             |           |           |
| H 1.190007  | -6.421796 | 2.799312  | H -0.941535 | 1.201644  | -7.776831 |             |           |           |

## 8.4. Compound 1

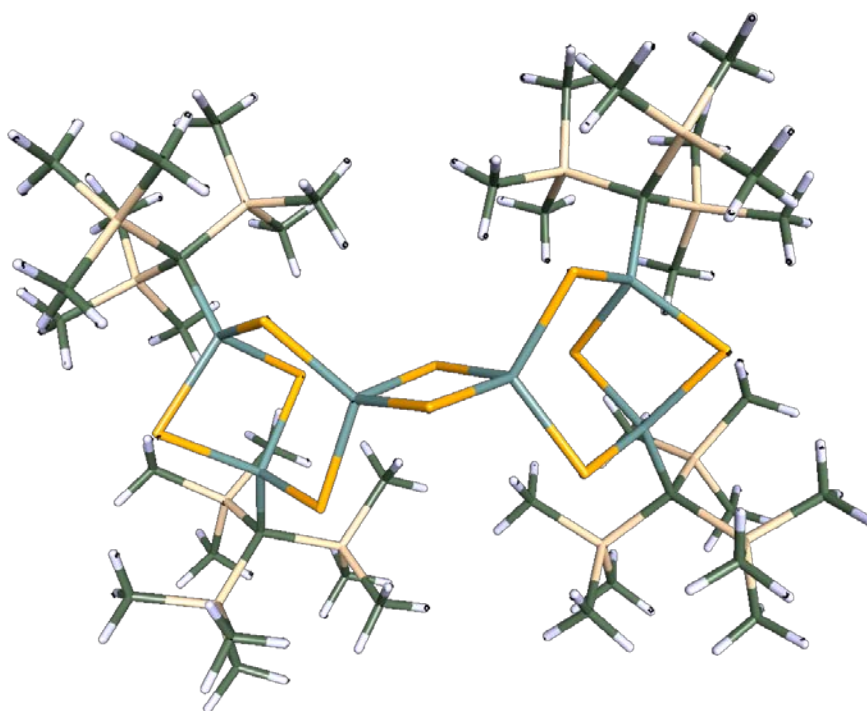

Figure S19: Geometry optimized structure

|                                |                                           |
|--------------------------------|-------------------------------------------|
| Point group:                   | $C_1$                                     |
| Energy:                        | -41540.582933927Hartree                   |
| Enthalpy:                      | 3889.95 kJ mol <sup>-1</sup>              |
| Entropy:                       | 2.56 kJ mol <sup>-1</sup> K <sup>-1</sup> |
| Lowest vibrational eigenvalue: | 9.04 cm <sup>-1</sup>                     |
| HOMO-LUMO-gap:                 | 2.519 eV                                  |

### Atom coordinates:

|                                  |                                  |                                 |
|----------------------------------|----------------------------------|---------------------------------|
| Se 0.379321 0.194701 -3.054100   | Si -3.080141 3.205370 -5.954422  | C 1.394287 -3.652953 -1.766669  |
| Ge -1.584964 1.054531 -4.194500  | Si 0.077347 3.411027 -5.606993   | C 3.467696 -4.817659 -3.687981  |
| Ge -0.250223 -1.783566 -4.297107 | Si 0.434689 -4.543991 -5.607251  | C 3.517047 -1.864891 -2.924281  |
| Se -1.568431 -0.604991 -5.943864 | Si 2.358647 -3.308052 -3.357223  | C 2.731056 -0.229251 -5.802708  |
| Se -3.423820 0.582895 -2.720335  | Si 2.261554 -2.005804 -6.267916  | C 3.924012 -2.866505 -6.608811  |
| C -1.597167 2.959013 -4.737200   | Se -0.657702 -0.623007 -0.019206 | C 1.322584 -1.916057 -7.915983  |
| Se -1.847743 -3.030958 -2.987882 | Se -4.079041 -1.924570 -0.010068 | Ge -2.394953 -1.195955 1.533306 |
| C 1.244706 -2.930689 -4.898952   | C -1.157709 -4.138516 -6.560890  | Se -2.069844 -3.039328 2.987778 |
| Ge -2.399747 -1.215034 -1.562276 | C 1.602282 -5.470712 -6.785298   | Se -3.226903 0.757628 2.600195  |
| Si -1.835069 3.987367 -3.105183  | C -0.043452 -5.810952 -4.274323  | Ge -0.437584 -1.954018 4.386780 |

|              |           |           |             |           |           |             |          |           |
|--------------|-----------|-----------|-------------|-----------|-----------|-------------|----------|-----------|
| Ge -1.379879 | 1.029965  | 4.117699  | H -0.062217 | -1.560173 | 7.952320  | H -2.279872 | 1.553632 | -7.707412 |
| Se 0.494399  | -0.137823 | 3.103645  | H 4.159289  | -3.433466 | 6.202470  | H -1.976181 | 3.241849 | -8.249287 |
| Se -1.694549 | -0.560190 | 5.906001  | H 3.183903  | -4.466808 | 7.305522  | H -3.640867 | 2.573222 | -8.287159 |
| C 0.867110   | -3.246735 | 5.118744  | H 3.878851  | -2.920822 | 7.895403  | H 1.669231  | 2.341831 | -7.176186 |
| C -1.107713  | 2.935616  | 4.595122  | H 1.060621  | -5.221102 | 7.967765  | H 0.399482  | 1.142845 | -6.745528 |
| Si -0.165300 | -4.748778 | 5.776115  | H 1.745421  | -6.187070 | 6.612684  | H 0.042494  | 2.433755 | -7.929375 |
| Si 2.047858  | -3.763025 | 3.670716  | H 0.167410  | -6.642573 | 7.336752  | H 2.442281  | 3.739840 | -4.923355 |
| Si 1.863947  | -2.406659 | 6.552765  | H 3.678117  | -5.592154 | 3.273291  | H 1.372498  | 4.251134 | -3.575023 |
| Si -0.879063 | 3.886313  | 2.912147  | H 3.509806  | -5.327486 | 5.040843  | H 1.677493  | 2.502791 | -3.871657 |
| Si -2.672645 | 3.548528  | 5.555520  | H 2.261662  | -6.258955 | 4.145179  | H 1.005315  | 5.317826 | -6.876946 |
| Si 0.476738  | 3.136339  | 5.707594  | H 2.980904  | -1.460361 | 3.142048  | H -0.702534 | 5.072755 | -7.352504 |
| C -1.766982  | -4.150418 | 6.604345  | H 4.153025  | -2.394109 | 4.139112  | H -0.309796 | 5.942287 | -5.826970 |
| C 0.806444   | -5.779030 | 7.042652  | H 3.935964  | -2.786896 | 2.401446  | C -2.504421 | 4.262629 | 2.004775  |
| C -0.683748  | -5.974695 | 4.419762  | H -1.300887 | -6.767205 | 4.901344  | C 0.202099  | 2.907265 | 1.702219  |
| C 1.168903   | -4.000828 | 2.010276  | H 0.178855  | -6.472862 | 3.929834  | C -0.043003 | 5.576033 | 3.166272  |
| C 2.946063   | -5.386849 | 4.087282  | H -1.301941 | -5.506908 | 3.624882  | C -2.673635 | 2.958076 | 7.360285  |
| C 3.400651   | -2.472903 | 3.326347  | H -2.477160 | -3.700436 | 5.874741  | C -4.316709 | 2.924441 | 4.843234  |
| C 2.513382   | -0.684382 | 6.104296  | H -2.279803 | -5.026249 | 7.063096  | C -2.775257 | 5.446265 | 5.558335  |
| C 3.405804   | -3.419161 | 7.018447  | H -1.585694 | -3.404812 | 7.406380  | C 0.562066  | 1.968339 | 7.201207  |
| C 0.825310   | -2.204985 | 8.129925  | H 1.733683  | -0.027756 | 5.673173  | C 2.074046  | 2.887322 | 4.710680  |
| H 1.958994   | -1.367081 | -8.646503 | H 2.887296  | -0.203823 | 7.035795  | C 0.568395  | 4.866559 | 6.496440  |
| H 1.093681   | -2.911503 | -8.351111 | H 3.351045  | -0.725128 | 5.379452  | H -0.346925 | 2.061919 | 1.231755  |
| H 0.370794   | -1.352130 | -7.810497 | H 0.779424  | -3.050861 | 1.582584  | H 0.512968  | 3.587673 | 0.879128  |
| H 4.615135   | -2.792790 | -5.742218 | H 1.926991  | -4.396378 | 1.296299  | H 1.126578  | 2.508178 | 2.167503  |
| H 3.832868   | -3.934154 | -6.892282 | H 0.323161  | -4.716111 | 2.045815  | H -3.218343 | 4.871280 | 2.598516  |
| H 4.404333   | -2.329952 | -7.458949 | C -3.634754 | 4.138857  | -2.513981 | H -2.246966 | 4.846635 | 1.091443  |
| H 1.860813   | -4.895863 | -7.698755 | C -0.869599 | 3.239028  | -1.657961 | H -3.015222 | 3.333325 | 1.675801  |
| H 2.545922   | -5.771885 | -6.283503 | C -1.243566 | 5.782893  | -3.317673 | H -0.001398 | 6.071628 | 2.169471  |
| H 1.081816   | -6.400370 | -7.110050 | C -2.690385 | 2.586860  | -7.706950 | H 0.998171  | 5.502735 | 3.543889  |
| H 4.156501   | -4.931716 | -2.820070 | C -4.634265 | 2.255703  | -5.423580 | H -0.616441 | 6.239110 | 3.847057  |
| H 4.089288   | -4.701896 | -4.599109 | C -3.546901 | 5.041706  | -6.099556 | H -5.132871 | 3.439526 | 5.400794  |
| H 2.892700   | -5.762822 | -3.780588 | C 0.581185  | 2.209161  | -6.986074 | H -4.451225 | 3.150556 | 3.765128  |
| H 2.970036   | -0.904052 | -2.809248 | C 1.512955  | 3.484479  | -4.365672 | H -4.457019 | 1.830896 | 4.985590  |
| H 4.329681   | -1.714455 | -3.665915 | C -0.013152 | 5.098931  | -6.481544 | H -2.963188 | 5.860158 | 4.544894  |
| H 3.993576   | -2.097568 | -1.944924 | H -1.284947 | 2.264059  | -1.321629 | H -3.634483 | 5.741200 | 6.202808  |
| H -0.539589  | -6.666258 | -4.787332 | H -0.964821 | 3.940536  | -0.800148 | H -1.864878 | 5.930513 | 5.965242  |
| H 0.831743   | -6.212903 | -3.722228 | H 0.212509  | 3.102170  | -1.863732 | H -2.484562 | 1.864804 | 7.438870  |
| H -0.759439  | -5.406359 | -3.528477 | H -4.307617 | 4.636808  | -3.242858 | H -1.928478 | 3.483070 | 7.994208  |
| H -1.969205  | -3.770087 | -5.894025 | H -3.619271 | 4.762159  | -1.590430 | H -3.681163 | 3.157695 | 7.790442  |
| H -1.528574  | -5.071161 | -7.043860 | H -4.072019 | 3.156918  | -2.238741 | H 1.606487  | 1.997231 | 7.585067  |
| H -1.003059  | -3.381884 | -7.358350 | H -1.446843 | 6.312888  | -2.359233 | H 0.305900  | 0.915502 | 6.972583  |
| H 1.887827   | 0.358969  | -5.392269 | H -0.157266 | 5.874881  | -3.525521 | H -0.107840 | 2.305731 | 8.018041  |
| H 3.087978   | 0.279994  | -6.725561 | H -1.798761 | 6.315404  | -4.118527 | H 2.934446  | 2.977262 | 5.411631  |
| H 3.551383   | -0.199637 | -5.057458 | H -5.452554 | 2.520352  | -6.132109 | H 2.211772  | 3.642781 | 3.908816  |
| H 0.854761   | -2.762021 | -1.376893 | H -4.978937 | 2.509754  | -4.399754 | H 2.120745  | 1.877862 | 4.249318  |
| H 2.143376   | -3.944691 | -0.995556 | H -4.496469 | 1.153035  | -5.473983 | H 1.544470  | 4.926470 | 7.030529  |
| H 0.653879   | -4.472659 | -1.855265 | H -3.952139 | 5.459801  | -5.154489 | H -0.228479 | 5.015938 | 7.256059  |
| H 1.457027   | -1.701010 | 8.896115  | H -4.341875 | 5.134720  | -6.874130 | H 0.526206  | 5.706608 | 5.775524  |
| H 0.478774   | -3.167889 | 8.560361  | H -2.691463 | 5.672875  | -6.415923 |             |          |           |

## 8.5. Tsi-Se-Se-Tsi

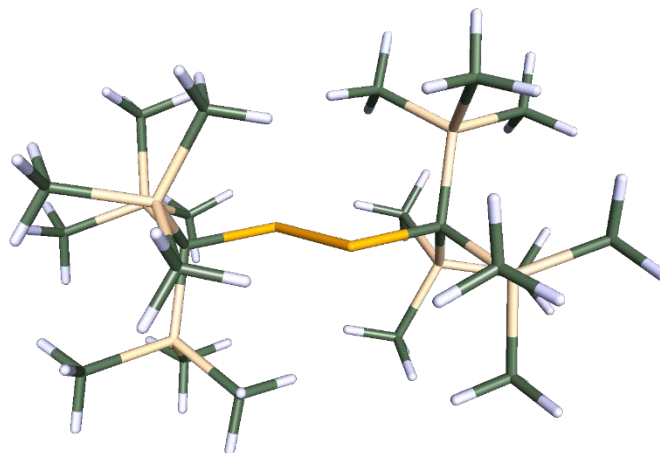

Figure S20: Geometry optimized structure

Point group:  $C_1$

Energy: -7334.11988754679 Hartree

Enthalpy: 1892.03 kJ mol<sup>-1</sup>

Entropy: 1.19 kJ mol<sup>-1</sup> K<sup>-1</sup>

Lowest vibrational eigenvalue: 3.61 cm<sup>-1</sup>

HOMO-LUMO-gap: 2.064 eV

### Atom coordinates:

|    |           |           |           |   |           |           |           |   |          |           |           |
|----|-----------|-----------|-----------|---|-----------|-----------|-----------|---|----------|-----------|-----------|
| C  | -2.559387 | 0.199551  | 0.441736  | C | 5.572810  | 0.400606  | 0.863281  | H | 2.257685 | 2.495572  | 2.932522  |
| Si | -3.860679 | 1.305411  | -0.479661 | C | -3.466284 | 1.476923  | -2.335857 | H | 5.659296 | 1.367460  | 1.403567  |
| Si | -2.764507 | -1.675290 | 0.053899  | C | -3.891597 | 3.090641  | 0.165251  | H | 6.289735 | -0.311100 | 1.332188  |
| Si | -2.546431 | 0.613336  | 2.324793  | C | -5.606784 | 0.572346  | -0.343837 | H | 5.891566 | 0.560899  | -0.187295 |
| Se | -0.901631 | 0.824950  | -0.497168 | C | -1.682772 | -0.730048 | 3.359843  | H | 2.510753 | -1.106953 | 3.031327  |
| Se | 0.867988  | 0.138340  | 1.011304  | C | -4.324394 | 0.702074  | 2.999405  | H | 3.319598 | 0.461086  | 3.376725  |
| C  | 2.525425  | 0.768313  | 0.074955  | C | -1.649818 | 2.237861  | 2.707796  | H | 4.276346 | -1.059766 | 3.327796  |
| Si | 3.827919  | -0.335713 | 0.996955  | C | -4.207014 | -2.425297 | 1.046046  | H | 4.568681 | -2.705475 | 0.983671  |
| Si | 2.727042  | 2.643267  | 0.464039  | C | -3.104433 | -1.973401 | -1.791243 | H | 4.197033 | -2.215952 | -0.703117 |
| Si | 2.514800  | 0.355323  | -1.808286 | C | -1.212904 | -2.687326 | 0.454939  | H | 2.858656 | -2.587290 | 0.444655  |
| C  | 4.293393  | 0.269717  | -2.481617 | H | 0.295368  | 3.299340  | 0.639681  | H | 4.245023 | 0.132510  | -3.585855 |
| C  | 1.649762  | 1.697801  | -2.843350 | H | 1.372270  | 4.713951  | 0.341552  | H | 4.855785 | 1.207141  | -2.284632 |
| C  | 1.620719  | -1.270379 | -2.192276 | H | 0.902164  | 3.630042  | -1.013142 | H | 4.879025 | -0.577657 | -2.066552 |
| C  | 3.064215  | 2.940805  | 2.309781  | H | 3.973172  | 3.390092  | -1.619973 | H | 2.163087 | 2.681438  | -2.791690 |
| C  | 4.169563  | 3.395947  | -0.526072 | H | 5.132759  | 2.873642  | -0.348857 | H | 0.588337 | 1.846209  | -2.550669 |
| C  | 1.174732  | 3.653575  | 0.061454  | H | 4.299746  | 4.458579  | -0.218866 | H | 1.660126 | 1.367903  | -3.907452 |
| C  | 3.431886  | -0.509137 | 2.852625  | H | 3.070485  | 4.038096  | 2.498966  | H | 1.765111 | -1.515858 | -3.269242 |
| C  | 3.862933  | -2.120496 | 0.351001  | H | 4.039567  | 2.535503  | 2.653808  | H | 0.530290 | -1.154654 | -2.007268 |

|             |           |           |             |           |           |             |           |          |
|-------------|-----------|-----------|-------------|-----------|-----------|-------------|-----------|----------|
| H 1.985054  | -2.126364 | -1.590483 | H -4.310010 | 2.029265  | -2.810343 | H -1.692379 | -0.399855 | 4.423862 |
| H -4.009462 | -2.419270 | 2.139733  | H -3.356883 | 0.506165  | -2.859582 | H -0.621619 | -0.879805 | 3.066886 |
| H -4.339300 | -3.487841 | 0.739442  | H -2.543976 | 2.072507  | -2.515940 | H -2.013180 | 3.094223  | 2.105964 |
| H -5.169534 | -1.901464 | 0.869615  | H -5.695466 | -0.394719 | -0.883394 | H -1.793364 | 2.483850  | 3.784758 |
| H -0.938169 | -2.662788 | 1.528964  | H -5.924865 | 0.413302  | 0.707130  | H -0.559677 | 2.120368  | 2.522329 |
| H -0.334200 | -2.335023 | -0.125528 | H -6.322892 | 1.284989  | -0.812570 | H -4.274899 | 0.839566  | 4.103560 |
| H -1.412352 | -3.747806 | 0.176605  | H -2.886421 | 3.555303  | 0.070589  | H -4.908844 | 1.550365  | 2.584540 |
| H -3.112722 | -3.070805 | -1.979711 | H -4.224742 | 3.187367  | 1.219556  | H -4.888592 | -0.234417 | 2.803184 |
| H -4.079556 | -1.566748 | -2.134326 | H -4.596595 | 3.676713  | -0.467239 |             |           |          |
| H -2.297935 | -1.529869 | -2.415233 | H -2.197345 | -1.713051 | 3.308619  |             |           |          |

## 8.6. Double-decker $\text{Ge}_4\text{Se}_6\text{Tsi}_4$

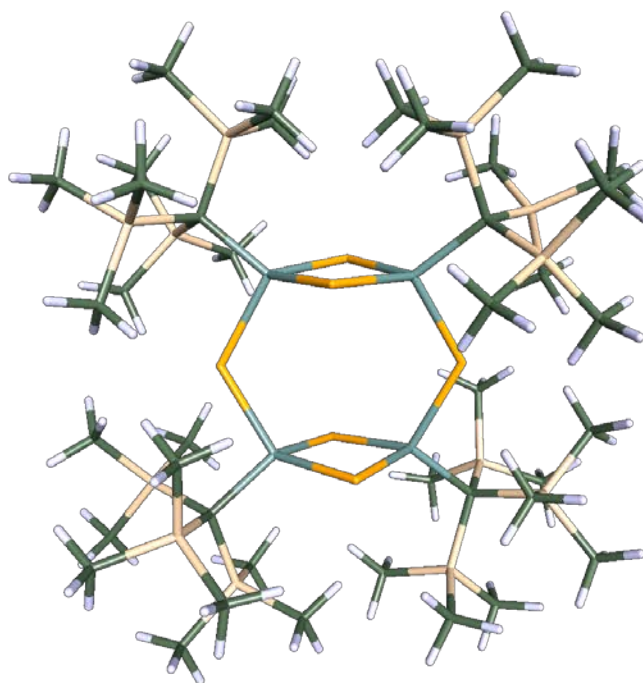

Figure S21: Geometry optimized structure

|                                |                                         |
|--------------------------------|-----------------------------------------|
| Point group:                   | $C_1$                                   |
| Energy:                        | -27779.9324360766 Hartree               |
| Enthalpy:                      | 3850.59 $\text{kJ mol}^{-1}$            |
| Entropy:                       | 2.28 $\text{kJ mol}^{-1} \text{K}^{-1}$ |
| Lowest vibrational eigenvalue: | 9.30 $\text{cm}^{-1}$                   |
| HOMO-LUMO-gap:                 | 2.588 eV                                |



## Atom coordinates:

170

|                                 |                                 |                                 |
|---------------------------------|---------------------------------|---------------------------------|
| Ge 1.337983 2.239984 0.182790   | C -5.195841 -4.104020 2.366747  | H 2.585227 4.264177 -2.673920   |
| Se -0.661631 2.156390 1.556567  | C -3.565897 -1.533508 2.714677  | H 3.413657 5.795827 -2.209620   |
| Ge -1.827383 1.863645 -0.531928 | C -5.515967 -2.308268 -0.542112 | H 3.621591 -5.045286 -3.016131  |
| Se 0.150798 2.166925 -1.906255  | C -3.339740 -3.088591 -2.637728 | H 2.259634 -3.867020 -3.085027  |
| Se -2.745298 -0.338341 -0.45150 | C -5.077838 -5.144642 -1.247413 | H 3.708505 -3.637999 -4.122413  |
| Ge -1.357092 -2.221543 0.101146 | H -1.726721 6.468759 0.101460   | H 6.288961 -4.318600 -1.366913  |
| Se 0.267159 -2.022847 1.870855  | H -2.828478 5.498983 1.118653   | H 6.358099 -3.513690 -2.968263  |
| Ge 1.847931 -1.892038 0.044459  | H -1.264934 4.808526 0.616018   | H 6.749294 -2.585137 -1.486858  |
| Se 2.751984 0.316493 0.186846   | H -2.460763 5.023745 -3.758958  | H 4.577600 -1.189349 -3.620725  |
| Se 0.249649 -2.350212 -1.699966 | H -1.496075 6.176883 -2.779144  | H 3.098598 -0.447573 -2.694089  |
| C 3.534578 -3.004158 -0.040687  | H -0.997471 4.454954 -2.884202  | H 4.717174 -0.379013 -2.023213  |
| C -2.743387 -3.651201 0.426342  | H -5.035570 6.084894 -0.553183  | H 3.209690 -0.933345 2.701107   |
| C -3.449485 2.945650 -1.103993  | H -5.094760 5.793743 -2.331522  | H 4.640830 -1.489427 3.629855   |
| C 2.692876 3.680596 0.639008    | H -3.973152 7.015661 -1.651845  | H 3.283533 -2.623635 3.312687   |
| Si 4.247343 -2.863300 -1.844656 | H -3.624276 3.637941 2.186214   | H 5.449519 -0.212008 0.054153   |
| Si 4.792428 -2.355243 1.299324  | H -5.392636 3.545324 2.484625   | H 6.797662 -1.396803 0.121784   |
| Si 3.174986 -4.871970 0.334609  | H -4.710592 4.960816 1.622651   | H 6.363819 -0.447575 1.576436   |
| Si -1.994836 -5.436172 0.354561 | H -6.365802 1.299313 1.368895   | H 6.712080 -3.991821 1.024796   |
| Si -3.454868 -3.357150 2.212277 | H -5.575301 0.412055 0.018857   | H 6.721580 -3.137832 2.598752   |
| Si -4.111163 -3.528235 -0.95578 | H -4.651630 0.776773 1.512952   | H 5.646112 -4.552269 2.365810   |
| Si -2.950600 4.816442 -1.288419 | H -6.934579 2.800279 -1.396588  | H 0.895677 -4.959333 -0.789349  |
| Si -4.930071 2.871469 0.152123  | H -7.298527 3.569734 0.177771   | H 1.504272 -6.581888 -0.305109  |
| Si -4.010364 2.251987 -2.836283 | H -6.472353 4.511038 -1.105347  | H 2.143400 -5.774976 -1.766619  |
| Si 3.436054 3.217266 2.380524   | H -4.653505 -0.130184 -2.325412 | H 1.990948 -4.408786 2.533092   |
| Si 4.105755 3.855146 -0.684647  | H -6.101934 0.928722 -2.182153  | H 3.665037 -4.992319 2.819312   |
| Si 1.806811 5.407061 0.763300   | H -5.459336 0.499649 -3.802484  | H 2.381124 -6.147004 2.330249   |
| C -4.423798 6.011132 -1.476889  | H -2.931770 1.375581 -4.889211  | H 4.817422 -6.069303 -1.176707  |
| C -2.107105 5.441870 0.282287   | H -2.004019 0.827376 -3.457673  | H 5.596222 -5.774781 0.418783   |
| C -1.874112 5.131229 -2.822120  | H -1.801037 2.509352 -4.075620  | H 4.337356 -7.039815 0.247052   |
| C -4.621173 3.861547 1.746431   | H -5.274400 3.034991 -4.803112  | H -3.958527 -1.501393 3.756898  |
| C -6.542160 3.510889 -0.638082  | H -5.916300 3.854608 -3.343174  | H -4.252906 -0.953671 2.070026  |
| C -5.410998 1.168315 0.808538   | H -4.403548 4.442622 -4.118295  | H -2.582885 -1.012630 2.709085  |
| C -4.983155 3.535757 -3.851631  | H 0.167218 4.947421 -1.123202   | H -5.954452 -3.542041 1.784800  |
| C -5.169435 0.750793 -2.756612  | H 0.187200 6.674804 -0.623717   | H -5.494842 -4.061654 3.438788  |
| C -2.538399 1.698300 -3.898233  | H 1.493657 6.017222 -1.647292   | H -5.230107 -5.166673 2.049576  |
| C 0.701536 5.535912 2.303478    | H 1.301780 5.586483 3.236403    | H -2.857361 -3.741013 4.568294  |
| C 2.991293 6.896642 0.869059    | H 0.107056 6.474027 2.233106    | H -2.465129 -5.231728 3.654459  |
| C 0.819274 5.780674 -0.803320   | H -0.009477 4.689701 2.396693   | H -1.359784 -3.808329 3.579090  |
| C 2.141377 2.396978 3.500922    | H 3.717215 6.864352 1.705232    | H 0.245255 -4.840028 1.381443   |
| C 4.910839 2.025007 2.335904    | H 3.546745 7.061744 -0.078223   | H -0.778057 -5.737063 2.532017  |
| C 4.108745 4.735514 3.312824    | H 2.339423 7.787486 1.024836    | H 0.014497 -6.613734 1.190503   |
| C 3.536832 4.696087 -2.293318   | H 1.243211 3.030310 3.660354    | H -0.948588 -6.851966 -1.414963 |
| C 4.900708 2.262488 -1.322095   | H 1.809516 1.409727 3.109189    | H -0.916502 -5.132052 -1.921573 |
| C 5.572042 4.851815 0.012828    | H 2.608746 2.215009 4.495504    | H -2.435045 -6.081136 -2.061251 |
| C 3.365478 -3.969586 -3.115905  | H 3.349069 5.507543 3.549718    | H -4.168682 -6.826344 0.493418  |
| C 4.140430 -1.129478 -2.597324  | H 4.944224 5.222447 2.767846    | H -2.678627 -7.742392 0.886800  |
| C 6.081158 -3.368798 -1.899178  | H 4.514687 4.359679 4.279694    | H -3.386243 -6.635717 2.100827  |
| C 6.065013 -3.657537 1.863138   | H 5.298718 1.937495 3.376549    | H -2.555410 -3.815929 -2.935094 |
| C 5.943825 -0.970199 0.689276   | H 5.749101 2.363471 1.692436    | H -2.894371 -2.071313 -2.656571 |
| C 3.883744 -1.798711 2.874101   | H 4.600543 1.016762 2.001404    | H -4.141877 -3.118491 -3.409918 |
| C 1.794395 -5.598492 -0.731376  | H 5.764949 2.573243 -1.954042   | H -5.645905 -5.456191 -0.345421 |
| C 2.768911 -5.115972 2.175960   | H 4.206023 1.675988 -1.955437   | H -4.478992 -6.005904 -1.605752 |
| C 4.639418 -6.018266 -0.081251  | H 5.283550 1.601337 -0.520950   | H -5.824092 -4.903556 -2.039683 |
| C -3.194359 -6.762480 1.014078  | H 6.126264 4.281624 0.788448    | H -5.766068 -1.701017 -1.437807 |
| C -1.538800 -5.909046 -1.429400 | H 5.300723 5.836761 0.437840    | H -5.273729 -1.605782 0.277032  |
| C -0.486454 -5.662466 1.467430  | H 6.276714 5.029199 -0.831538   | H -6.431250 -2.871031 -0.255036 |
| C -2.424517 -4.123393 3.615708  | H 4.322596 4.506257 -3.059144   |                                 |

## 8.7. Adamantane Ge<sub>4</sub>Se<sub>6</sub>Tsi<sub>4</sub>

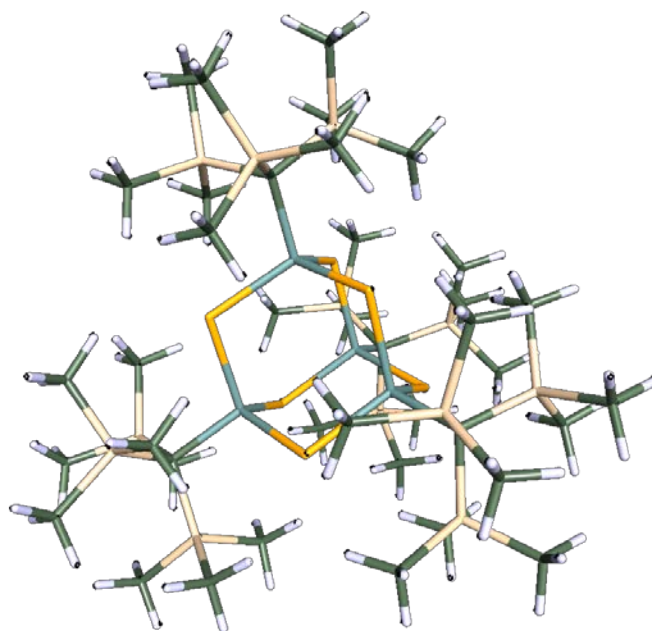

Figure S22: Geometry optimized structure

|                                |                                           |
|--------------------------------|-------------------------------------------|
| Point group:                   | C <sub>1</sub>                            |
| Energy:                        | -27780.0072549071 Hartree                 |
| Enthalpy:                      | 3840.76 kJ mol <sup>-1</sup>              |
| Entropy:                       | 2.31 kJ mol <sup>-1</sup> K <sup>-1</sup> |
| Lowest vibrational eigenvalue: | 22.08 cm <sup>-1</sup>                    |
| HOMO-LUMO-gap:                 | 3.163 eV                                  |

### Atom coordinates:

170

|                                  |                                  |                                 |
|----------------------------------|----------------------------------|---------------------------------|
| Ge 0.115500 1.614713 1.627718    | C -3.829931 0.343850 -2.063520   | Si -0.817897 2.450743 4.580475  |
| Se -2.007769 1.841024 0.579262   | C 0.245323 3.010228 3.052495     | Si 2.108309 3.205368 3.571445   |
| Ge -2.073347 0.181065 -1.123694  | Si 2.755009 -0.435381 -4.494524  | C 3.216790 -2.905649 2.540683   |
| Se -1.950135 -2.006391 -0.197051 | Si 3.371285 2.433702 -3.253485   | C 1.168121 -3.152452 4.774828   |
| Ge 0.139462 -2.118313 0.933750   | Si 4.828276 -0.149693 -2.090977  | C 2.299819 -5.647307 3.536221   |
| Se 0.295759 -0.511589 2.679196   | Si -1.412483 -4.375010 2.595832  | C 0.319572 -7.004083 0.934624   |
| Se 1.931267 -1.883063 -0.613065  | Si 0.713013 -5.225260 0.379501   | C 2.556580 -5.276532 -0.097110  |
| Ge 1.697156 0.286210 -1.557795   | Si 1.696899 -3.893887 3.101608   | C -0.239841 -4.922539 -1.232973 |
| Se 1.904135 1.975911 0.103741    | Si -3.726136 -0.604447 -3.756757 | C -2.728104 -5.022685 1.380503  |
| Se -0.356557 0.530755 -2.733087  | Si -5.215052 -0.436067 -0.945282 | C -2.201633 -2.899707 3.491927  |
| C 3.184790 0.537634 -2.868533    | Si -4.203608 2.225596 -2.373801  | C -1.226551 -5.771866 3.876656  |
| C 0.286534 -3.930046 1.764698    | Si -0.431723 4.688720 2.345737   | C -1.224837 3.915109 5.728062   |

|             |           |           |             |           |           |             |           |           |
|-------------|-----------|-----------|-------------|-----------|-----------|-------------|-----------|-----------|
| C 0.050918  | 1.190219  | 5.713965  | H 3.099939  | 1.042933  | 2.701128  | H -6.041035 | -1.697993 | -3.820138 |
| C -2.468784 | 1.659975  | 4.081284  | H 2.535171  | 0.833169  | 4.391721  | H -6.065837 | -0.086955 | -4.616264 |
| C 2.281210  | 4.058187  | 5.265492  | H 1.859084  | 3.470400  | 6.106333  | H -1.720422 | -2.101791 | -3.369174 |
| C 3.017386  | 1.543758  | 3.689552  | H 1.821272  | 5.067511  | 5.283038  | H -2.841304 | -2.753349 | -4.615701 |
| C 3.137707  | 4.291924  | 2.392986  | H 3.370776  | 4.182179  | 5.461227  | H -3.225030 | -2.937890 | -2.867180 |
| C 0.157956  | 6.177114  | 3.376970  | H 4.171563  | 4.331397  | 2.806061  | H -3.385385 | 1.328577  | -5.397909 |
| C -2.330984 | 4.829174  | 2.358517  | H 2.768211  | 5.335511  | 2.317968  | H -1.809357 | 0.606082  | -4.929321 |
| C 0.109238  | 5.004104  | 0.554074  | H 3.208277  | 3.877671  | 1.366127  | H -2.892558 | -0.264024 | -6.059165 |
| C 6.367376  | 0.535413  | -2.979204 | H 1.403336  | -0.169430 | -6.547719 | H -5.093713 | 4.193350  | -1.170584 |
| C 5.009020  | 0.281805  | -0.251845 | H 1.944539  | 1.455442  | -6.015128 | H -5.876517 | 2.724325  | -0.502904 |
| C 5.019745  | -2.041042 | -2.214511 | H 0.558202  | 0.654969  | -5.201107 | H -4.209508 | 3.165322  | -0.000890 |
| C 4.334857  | 2.731528  | -4.868951 | H 4.806640  | 0.198048  | -5.861081 | H -6.481310 | 1.972194  | -3.481932 |
| C 4.346954  | 3.403339  | -1.935760 | H 3.962988  | -1.253168 | -6.492659 | H -5.197964 | 2.120506  | -4.731318 |
| C 1.702543  | 3.318960  | -3.430248 | H 5.053233  | -1.401318 | -5.079304 | H -5.716258 | 3.562119  | -3.803520 |
| C 1.969248  | -2.128817 | -4.152549 | H 0.980238  | -2.036701 | -3.654329 | H -2.183550 | 2.790451  | -3.818051 |
| C 4.301683  | -0.743323 | -5.561968 | H 1.812186  | -2.636357 | -5.132003 | H -1.900225 | 3.244810  | -2.106757 |
| C 1.555127  | 0.480548  | -5.655831 | H 2.605966  | -2.784199 | -3.523599 | H -2.987037 | 4.246879  | -3.131162 |
| C -4.911313 | 3.139240  | -0.859828 | H 1.906370  | 4.374861  | -3.722054 | H 3.224067  | -5.554053 | 0.744738  |
| C -2.667648 | 3.202685  | -2.909161 | H 1.135561  | 3.334238  | -2.474898 | H 2.668200  | -6.056563 | -0.884603 |
| C -5.520142 | 2.468189  | -3.728287 | H 1.048966  | 2.867947  | -4.204686 | H 2.922970  | -4.320679 | -0.525483 |
| C -5.000888 | -0.016551 | 0.892810  | H 4.390255  | 4.463059  | -2.276612 | H 0.009526  | -5.749854 | -1.936530 |
| C -5.320473 | -2.335118 | -1.046102 | H 3.858590  | 3.397084  | -0.939386 | H 0.052527  | -3.965954 | -1.716534 |
| C -6.950488 | 0.159277  | -1.455730 | H 5.391200  | 3.050393  | -1.808821 | H -1.340219 | -4.909062 | -1.093880 |
| C -2.872598 | 0.376823  | -5.148185 | H 3.814278  | 2.355891  | -5.773789 | H -0.760696 | -7.188426 | 1.107470  |
| C -5.455292 | -0.998285 | -4.451031 | H 4.448800  | 3.833485  | -4.985275 | H 0.644943  | -7.683686 | 0.114219  |
| C -2.791958 | -2.250599 | -3.622524 | H 5.352429  | 2.290517  | -4.846577 | H 0.871843  | -7.297392 | 1.850857  |
| H -2.772814 | 4.760928  | 3.374047  | H 6.380249  | 0.288400  | -4.060615 | H 3.994835  | -2.996680 | 3.333153  |
| H -2.587359 | 5.832483  | 1.947846  | H 7.257017  | 0.052829  | -2.513911 | H 2.987385  | -1.826031 | 2.412492  |
| H -2.827278 | 4.072970  | 1.715998  | H 6.492952  | 1.632496  | -2.872829 | H 3.649504  | -3.276872 | 1.589212  |
| H 1.211096  | 5.001960  | 0.426127  | H 4.231575  | -0.211597 | 0.370037  | H 0.345610  | -3.712244 | 5.266209  |
| H -0.271688 | 6.007320  | 0.253977  | H 4.961189  | 1.372250  | -0.054329 | H 0.864991  | -2.087408 | 4.704903  |
| H -0.315608 | 4.254676  | -0.147869 | H 6.003215  | -0.088122 | 0.089217  | H 2.054902  | -3.201041 | 5.447346  |
| H 1.256286  | 6.330898  | 3.351135  | H 4.232626  | -2.597131 | -1.664680 | H 3.060842  | -5.542431 | 4.342862  |
| H -0.157788 | 6.111178  | 4.438395  | H 5.039663  | -2.415959 | -3.258714 | H 2.785650  | -6.174912 | 2.689889  |
| H -0.315002 | 7.086927  | 2.941819  | H 5.996892  | -2.300644 | -1.746673 | H 1.486239  | -6.292998 | 3.925921  |
| H -3.038475 | 1.442933  | 5.014030  | H -7.683915 | -0.373288 | -0.808226 | H -3.016549 | -4.275408 | 0.612816  |
| H -2.324434 | 0.700161  | 3.540664  | H -7.109936 | 1.247385  | -1.310003 | H -3.639808 | -5.252720 | 1.977897  |
| H -3.092586 | 2.317985  | 3.442331  | H -7.193032 | -0.088348 | -2.509501 | H -2.427204 | -5.954057 | 0.857824  |
| H 0.282509  | 0.232304  | 5.204023  | H -4.400701 | -2.841326 | -0.687256 | H -0.816998 | -6.702987 | 3.434019  |
| H 0.988640  | 1.574081  | 6.166233  | H -5.545782 | -2.712919 | -2.064760 | H -0.598182 | -5.497338 | 4.748687  |
| H -0.653274 | 0.960681  | 6.546093  | H -6.154500 | -2.651642 | -0.378862 | H -2.245959 | -6.003046 | 4.261526  |
| H -0.315879 | 4.419264  | 6.115504  | H -5.869940 | -0.443589 | 1.444168  | H -2.480056 | -2.085224 | 2.789146  |
| H -1.778958 | 3.503264  | 6.602205  | H -4.076086 | -0.463259 | 1.316734  | H -1.545277 | -2.464053 | 4.272869  |
| H -1.873151 | 4.682902  | 5.257913  | H -4.970321 | 1.074446  | 1.090761  | H -3.134109 | -3.258729 | 3.985084  |
| H 4.049980  | 1.745254  | 4.056593  | H -5.308070 | -1.487844 | -5.440719 |             |           |           |

## 8.8. Tsi-Se-Se-Se-Tsi

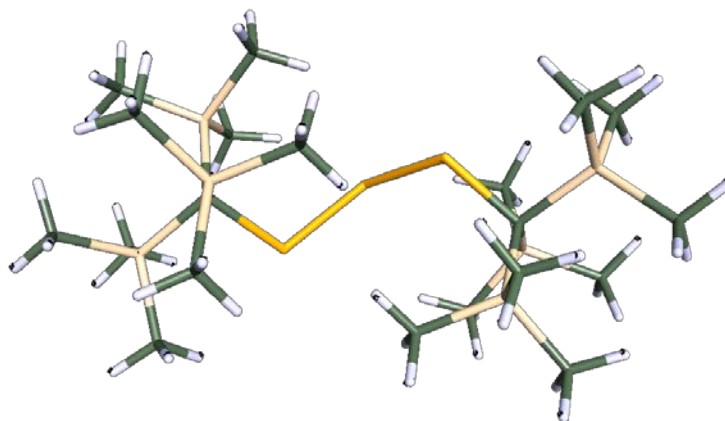

Figure S23: Geometry optimized structure

|                                |                                           |
|--------------------------------|-------------------------------------------|
| Point group:                   | $C_1$                                     |
| Energy:                        | -9735.7083828508 Hartree                  |
| Enthalpy:                      | 1899.92 kJ mol <sup>-1</sup>              |
| Entropy:                       | 1.24 kJ mol <sup>-1</sup> K <sup>-1</sup> |
| Lowest vibrational eigenvalue: | 6.59 cm <sup>-1</sup>                     |
| HOMO-LUMO-gap:                 | 2.426 eV                                  |

Atom coordinates:

83

|              |           |           |             |           |           |             |           |           |
|--------------|-----------|-----------|-------------|-----------|-----------|-------------|-----------|-----------|
| Se -2.900857 | 1.907201  | -0.684172 | C -6.232523 | 0.698220  | 0.829385  | H -8.195321 | 0.862928  | -1.660038 |
| Se -0.787091 | 0.963244  | -0.188113 | C 3.718157  | 4.380183  | 0.445042  | H -7.151149 | 0.933224  | -3.117184 |
| C -4.098370  | 0.530983  | -1.544923 | C 2.446584  | 1.700134  | 1.261303  | H -7.241456 | -0.579240 | -2.148227 |
| Se 0.803038  | 1.227006  | -1.921311 | C 0.740116  | 4.207581  | 1.038874  | H -6.320338 | -0.395743 | 0.996127  |
| C 1.883437   | 2.905711  | -1.635203 | C -0.849998 | 4.450774  | -2.095058 | H -5.462237 | 1.097222  | 1.524320  |
| Si 0.979291  | 4.331298  | -2.558891 | C 1.779333  | 6.017032  | -2.182025 | H -7.207280 | 1.161207  | 1.105169  |
| Si 2.183356  | 3.273726  | 0.232141  | C 0.995952  | 4.074940  | -4.442142 | H -5.667193 | 3.528097  | -1.963066 |
| Si 3.536296  | 2.395145  | -2.513864 | C 4.621647  | 1.265814  | -1.441044 | H -6.990493 | 3.364635  | -0.758531 |
| Si -3.768938 | -1.246315 | -0.877614 | C 4.555642  | 3.919313  | -3.008399 | H -5.295400 | 3.542266  | -0.205046 |
| Si -3.866931 | 0.683901  | -3.449577 | C 3.225435  | 1.390452  | -4.101980 | H -4.322985 | -1.709606 | -4.158134 |
| Si -5.832956 | 1.177401  | -0.963540 | H -3.425857 | -2.329549 | 1.333567  | H -4.674494 | -0.537265 | -5.467355 |
| C -3.354513  | -1.276974 | 0.975012  | H -4.037842 | -0.658081 | 1.589806  | H -5.851943 | -0.765809 | -4.131228 |
| C -5.297569  | -2.348128 | -1.152381 | H -2.315247 | -0.931503 | 1.164152  | H -4.024283 | 3.195440  | -3.587412 |
| C -2.329921  | -2.106399 | -1.768955 | H -6.175191 | -2.037105 | -0.545977 | H -5.617241 | 2.464618  | -4.011062 |
| C -4.517263  | 2.344135  | -4.106727 | H -5.036495 | -3.387875 | -0.849994 | H -4.263227 | 2.419710  | -5.188406 |
| C -2.049005  | 0.626835  | -3.968143 | H -5.607175 | -2.376004 | -2.218208 | H -1.487441 | 1.502188  | -3.577685 |
| C -4.770041  | -0.714729 | -4.371958 | H -1.388473 | -1.526651 | -1.665036 | H -1.518831 | -0.284977 | -3.626449 |
| C -5.937426  | 3.079180  | -0.986039 | H -2.170377 | -3.101526 | -1.293700 | H -1.994318 | 0.656749  | -5.080496 |
| C -7.221781  | 0.528344  | -2.085020 | H -2.525426 | -2.277603 | -2.848921 | H 3.638159  | 5.320708  | -0.139194 |

|                               |                                |                                |
|-------------------------------|--------------------------------|--------------------------------|
| H 4.664324 3.874261 0.156893  | H 5.509436 0.963366 -2.042209  | H -1.027153 4.570558 -1.006966 |
| H 3.802979 4.657309 1.520456  | H 4.073526 0.339372 -1.163247  | H -1.411124 3.550312 -2.424564 |
| H -0.205940 3.631701 0.959010 | H 4.205175 1.256323 -4.616249  | H 2.008655 4.135316 -4.893961  |
| H 0.971334 4.334743 2.121283  | H 2.533473 1.884110 -4.813556  | H 0.370484 4.867566 -4.912233  |
| H 0.577980 5.219360 0.609148  | H 2.827437 0.375605 -3.881952  | H 0.548784 3.092726 -4.711404  |
| H 3.164525 0.990108 0.804866  | H 4.050109 4.524703 -3.790807  | H 1.657407 6.305230 -1.115292  |
| H 2.840007 1.994811 2.261291  | H 4.783749 4.583478 -2.149362  | H 1.272532 6.796243 -2.795725  |
| H 1.489291 1.159764 1.427271  | H 5.523101 3.565095 -3.431414  | H 2.862073 6.048920 -2.423310  |
| H 4.992490 1.744430 -0.510609 | H -1.289994 5.333866 -2.612243 |                                |

## 8.9. Competing reactions

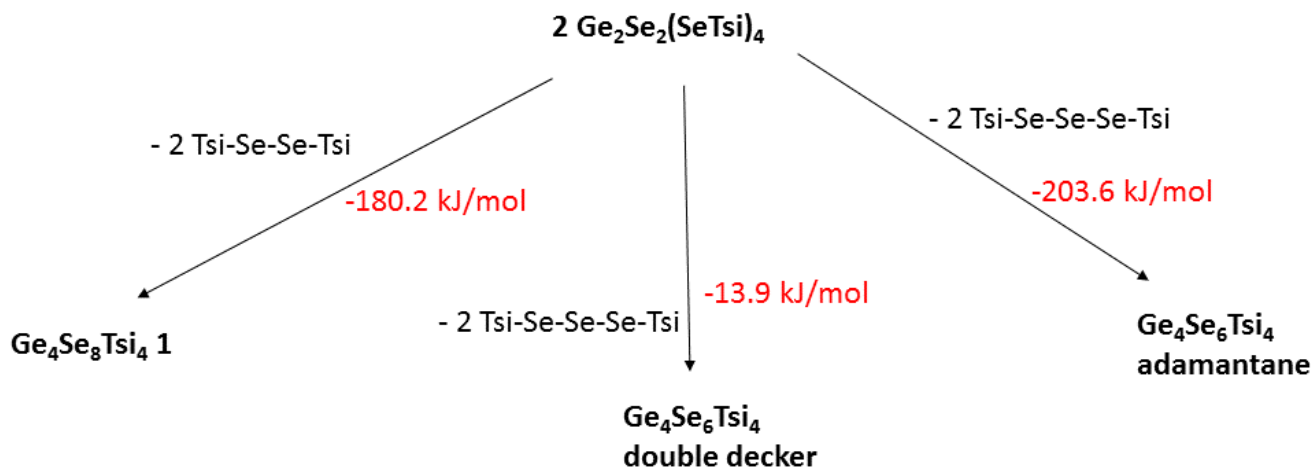

<sup>1</sup> Turbomole: O. Treutler, R. Ahlrichs, *J. Chem. Phys.* **1995**, *102*, 346 – 354; BP86 functional: J. P. Perdew, *Phys. Rev. B* **1986**, *33*, 8822 – 8824; A. D. Becke, *Phys. Rev. A* **1988**, *38*, 3098 – 3100; RI-DFT: K. Eichkorn, O. Treutler, H. Öhm, M. Häser, R. Ahlrichs, *Chem. Phys. Lett.* **1995**, *240*, 283 – 290; SVP: A. Schäfer, H. Horn, R. Ahlrichs, *J. Chem. Phys.* **1992**, *97*, 2571 – 2577. TmoleX client: C. Steffen, K. Thomas, U. Huniar, A. Hellweg, O. Rubner, A. Schroer, *J. Comput. Chem.* **2010**, *31*, 2967 – 2970. DFT-D3 BJ damping: S. Grimme, S. Ehrlich, L. Goerigk, *J. Comput. Chem.* **2011**, *32*, 1456-1465
